# Supplementary material for: Assessing the Impacts of Chloride and Sulfate Ions on Macroinvertebrate Communities in Ohio Streams
Source: MDPI journal article supplement (doi:10.3390/w13131815), 2021-06-30
Supplement: s1 [file s1]

Supplementary Material for Manuscript ID: water-1245899

A list of taxa and extirpation concentrations (XC95) for chloride and sulfate. Concentrations are in mg/l. Group codes used by Ohio EPA are as follows: N – non insect; M – mayfly; O – other; S – stonefly; C – caddisfly; D – dipteran; T – midges in the tribe Tanytarsini. Tolerance codes used by Ohio EPA are as follows: F – facultative; MT – moderately tolerant; MI – moderately intolerant; T – tolerant; NA – not assigned; I – intolerant; VT – very tolerant.

| ITIS Serial Number | Ohio EPA Taxa Code | Name                         | Group | Tolerance | Chloride | Sulfate | Sulfate WAP |
|--------------------|--------------------|------------------------------|-------|-----------|----------|---------|-------------|
| 47691              | X00401             | Spongillidae                 | N     | F         | 194.6    | 586.8   | 420.3       |
| 47714              | X00556             | Ephydatia fluviatilis        | N     | MT        | 237.7    | 298.4   |             |
| 47705              | X00653             | Eunapius fragilis            | N     | F         | 146.7    | 197.9   | 169.5       |
| 659505             | X00700             | Radiospongilla crateriformis | N     | F         | 105.8    | 115.3   |             |
| 48893              | X01200             | Cordylophora caspia          | N     | MT        | 54.2     |         |             |
| 50845              | X01320             | Hydra sp                     | N     | F         | 164.4    | 304.5   | 348.4       |
| 53964              | X01801             | Turbellaria                  | N     | F         | 306.1    | 1308.2  | 1389.3      |
| 57411              | X01900             | Nemertea                     | N     | F         | 122.1    | 541.3   | 672.3       |
| 64183              | X02600             | Nematomorpha                 | N     | F         | 117.9    | 297.4   | 239.3       |
| 155470             | X03000             | Ectoprocta                   | N     | F         | 146.5    | 254.4   | 314.3       |
| 156722             | X03040             | Fredericella sp              | N     | F         | 255.6    | 482.5   | 505.5       |
| 155546             | X03121             | Paludicella articulata       | N     | MI        | 235.7    | 191.6   |             |
| 156731             | X03221             | Pectinatella magnifica       | N     | F         | 80.2     |         |             |
| 156690             | X03301             | Plumatellidae                | N     | NA        | 44.8     |         |             |
| 156691             | X03360             | Plumatella sp                | N     | F         | 276.9    | 765.9   | 871.3       |
| 156754             | X03451             | Urnatella gracilis           | N     | MI        | 138.7    | 155.2   | 166.6       |
| 68422              | X03600             | Oligochaeta                  | N     | T         | 306      | 1274.5  | 1322        |
| 68621              | X03925             | Branchiura sowerbyi          | N     | NA        | 108      | 143.7   |             |
| 89856              | X04410             | Eiseniella tetraedra         | N     | NA        | 79.4     |         |             |
| 69374              | X04637             | Placobdella phalera          | N     | MT        | 75.9     | 83.1    |             |
| 69381              | X04653             | Glossiphonia complanata      | N     | MT        | 81.1     | 92.8    |             |
| 69396              | X04660             | Helobdella sp                | N     | MT        | 158.7    |         |             |
| 69397              | X04661             | Helobdella elongata          | N     | MT        | 124.3    | 120.9   |             |
| 69398              | X04664             | Helobdella stagnalis         | N     | T         | 237.8    | 707     | 670.7       |
| 69403              | X04666             | Helobdella papillata         | N     | MT        | 321.6    | 552     | 1136.9      |
| 69363              | X04680             | Placobdella sp               | N     | MT        | 110.1    | 291.3   |             |
| 69368              | X04682             | Placobdella montifera        | N     | MT        | 120.4    | 456.8   | 586         |
| 69367              | X04683             | Placobdella multilineata     | N     | F         | 140.9    |         |             |
| 69366              | X04685             | Placobdella ornata           | N     | MT        | 215      | 960.7   | 726.1       |
| 69364              | X04686             | Placobdella papillifera      | N     | MT        | 183      | 210.9   | 401         |
| 69365              | X04687             | Placobdella parasitica       | N     | MT        | 162.4    | 496.4   | 537.2       |
| 69438              | X04901             | Erpobdellidae                | N     | MT        | 141.5    | 174.5   |             |

|               |        |                                         |   |    |       |        |        |
|---------------|--------|-----------------------------------------|---|----|-------|--------|--------|
| <b>69444</b>  | X04930 | Erpobdella sp                           | N | MT | 230.3 | 111.2  |        |
| <b>69446</b>  | X04935 | Erpobdella punctata punctata            | N | MT | 300.2 | 287.3  | 315.3  |
| <b>69449</b>  | X04960 | Erpobdella sp (=Mooreobdella)           | N | MT | 194   | 199.7  |        |
| <b>69451</b>  | X04962 | Erpobdella fervida                      | N | MT | 236   | 142    |        |
| <b>69450</b>  | X04964 | Erpobdella microstoma                   | N | MT | 281.7 | 226.3  | 305    |
| <b>92686</b>  | X05800 | Caecidotea sp                           | N | T  | 246.8 | 801.2  | 769.7  |
| <b>92666</b>  | X05900 | Lirceus sp                              | N | MT | 251.1 | 594.4  | 301    |
| <b>94025</b>  | X06201 | Hyaella sp                              | N | F  | 245.4 | 1021.6 | 1042.8 |
| <b>95081</b>  | X06700 | Crangonyx sp                            | N | MT | 298.5 | 1003.7 | 979.7  |
| <b>93780</b>  | X06810 | Gammarus fasciatus                      | N | F  | 225.8 | 802.3  | 600.4  |
| <b>573812</b> | X06830 | Gammarus minus                          | N | F  | 134.3 | 1241.5 | 1241.5 |
| <b>93950</b>  | X06904 | Synurella dentata                       | N | MT | 108.6 | 221.9  |        |
| <b>97336</b>  | X07701 | Cambaridae                              | N | NA | 145.9 | 474.7  | 453.1  |
| <b>97337</b>  | X07800 | Cambarus sp                             | N | F  | 95.1  | 266.2  | 302.9  |
| <b>650415</b> | X07810 | Cambarus (Cambarus) carinirostris       | N | F  | 95    | 719.2  | 604.1  |
| <b>650416</b> | X07820 | Cambarus (Cambarus) bartonii cavatus    | N | MT | 109.3 | 492.7  | 503.9  |
| <b>97402</b>  | X07840 | Cambarus (Cambarus) sciotensis          | N | MI | 88.2  | 218.6  | 154.6  |
| <b>97400</b>  | X07860 | Cambarus (Puncticambarus) robustus      | N | F  | 96.4  | 742.3  | 617    |
| <b>97337</b>  | X07870 | Lacunicambarus sp                       | N | NA | 71.1  | 128.4  |        |
| <b>97337</b>  | X07875 | Lacunicambarus polychromatus            | N | MT | 115.9 | 293.8  |        |
| <b>203635</b> | X07880 | Lacunicambarus thomai                   | N | T  | 56    | 700.8  | 764    |
| <b>97421</b>  | X08200 | Faxonius sp                             | N | F  | 178.6 | 662.2  | 579.6  |
| <b>650401</b> | X08201 | Faxonius cristavarius                   | N | F  | 48.6  | 189.8  | 188    |
| <b>97446</b>  | X08220 | Faxonius immunis                        | N | T  | 167.2 | 219.6  |        |
| <b>97466</b>  | X08230 | Faxonius obscurus                       | N | MT | 145   | 1335.3 | 1242.1 |
| <b>97473</b>  | X08240 | Faxonius propinquus                     | N | F  | 169.2 | 84.7   |        |
| <b>97424</b>  | X08250 | Faxonius rusticus                       | N | F  | 296   | 706    | 813.6  |
| <b>97421</b>  | X08255 | Faxonius rusticus x sanbornii           | N | F  | 96.1  | 584.8  | 678.4  |
| <b>650422</b> | X08260 | Faxonius sanbornii sanbornii            | N | F  | 276.3 | 1153.1 | 1050.6 |
| <b>97482</b>  | X08270 | Faxonius sloanii                        | N | F  | 139   | 121.4  |        |
| <b>650438</b> | X08310 | Procambarus (Ortmannicus) acutus acutus | N | T  | 122.9 | 80.1   |        |

|               |        |                                               |   |    |       |        |       |
|---------------|--------|-----------------------------------------------|---|----|-------|--------|-------|
| <b>96396</b>  | X08451 | <i>Palaemon kadiakensis</i>                   | N | F  | 158.3 | 496.6  |       |
| <b>82754</b>  | X08601 | Hydrachnidia                                  | N | F  | 274.7 | 949.5  | 949.5 |
| <b>100755</b> | X11001 | Baetidae                                      | M | NA | 160.8 | 279.1  |       |
| <b>100801</b> | X11012 | <i>Acentrella nadineae</i>                    | M | MI | 32.5  | 118.7  | 123   |
| <b>568574</b> | X11014 | <i>Acentrella turbida</i>                     | M | I  | 130.1 | 270.5  | 269.5 |
| <b>568546</b> | X11015 | <i>Acerpenna</i> sp                           | M | MI | 64.1  | 182.6  |       |
| <b>568671</b> | X11018 | <i>Acerpenna macdunnoughi</i>                 | M | MI | 87    | 300.3  | 299.9 |
| <b>206620</b> | X11020 | <i>Acerpenna pygmaea</i>                      | M | MI | 123.7 | 226.4  | 238.8 |
| <b>609530</b> | X11110 | <i>Acentrella parvula</i>                     | M | I  | 39.8  | 58     |       |
| <b>100817</b> | X11115 | <i>Baetis tricaudatus</i>                     | M | MI | 214.6 | 353.7  | 413.5 |
| <b>568607</b> | X11116 | <i>Plauditus cestus</i>                       | M | I  | 35.7  |        |       |
| <b>609559</b> | X11118 | <i>Plauditus dubius</i>                       | M | MI | 122.2 | 151    | 162.8 |
| <b>568553</b> | X11119 | <i>Plauditus dubius</i> or <i>P. virilis</i>  | M | I  | 111.4 | 302.1  | 310.9 |
| <b>100835</b> | X11120 | <i>Baetis flavistriga</i>                     | M | F  | 304.4 | 447.7  | 454.8 |
| <b>100771</b> | X11121 | <i>Labiobaetis</i> sp                         | M | MI | 57    | 244.2  | 248.9 |
| <b>568680</b> | X11123 | <i>Labiobaetis dardanus</i>                   | M | MI | 91.2  | 150.4  |       |
| <b>568684</b> | X11125 | <i>Labiobaetis frondalis</i>                  | M | MI | 92.8  | 375    | 376.4 |
| <b>100808</b> | X11130 | <i>Baetis intercalaris</i>                    | M | F  | 302.9 | 683.1  | 672.4 |
| <b>568681</b> | X11150 | <i>Labiobaetis propinquus</i>                 | M | MI | 113.4 | 524.3  | 646.5 |
| <b>100794</b> | X11155 | <i>Iswaeon anoka</i>                          | M | MI | 82.4  | 78     |       |
| <b>568609</b> | X11172 | <i>Plauditus punctiventris</i>                | M | MI | 37.3  | 198.7  |       |
| <b>100903</b> | X11200 | <i>Callibaetis</i> sp                         | M | MT | 247.7 | 1223.5 | 1234  |
| <b>100757</b> | X11245 | <i>Anafroptilum</i> sp or <i>Neocloeon</i> sp | M | F  | 188.9 | 484.9  | 527.2 |
| <b>100757</b> | X11250 | <i>Neocloeon</i> sp                           | M | MI | 167.6 | 529.6  | 580.3 |
| <b>100873</b> | X11251 | <i>Anafroptilum</i> sp                        | M | F  | 63    | 346.7  | 349   |
| <b>100873</b> | X11260 | <i>Anafroptilum</i> minor group sp 1          | M | I  | 45.5  | 339    | 335.9 |
| <b>609552</b> | X11295 | <i>Cloeon dipterum</i>                        | M | T  | 329.3 | 557.5  |       |
| <b>568598</b> | X11430 | <i>Dipheter hageni</i>                        | M | MI | 110.3 | 448.1  | 449.7 |
| <b>100794</b> | X11503 | <i>Heterocloeon</i> (H.) sp.                  | M | I  | 77.7  | 94.8   |       |
| <b>100899</b> | X11600 | <i>Paracloeodes fleeki</i>                    | M | MI | 95.4  | 425    | 446.9 |
| <b>100901</b> | X11620 | <i>Paracloeodes minutus</i>                   | M | MI | 140   | 141.8  | 147.6 |
| <b>206622</b> | X11645 | <i>Procloeon</i> sp                           | M | MI | 106   | 372.5  | 372.5 |
| <b>206622</b> | X11650 | <i>Procloeon</i> sp (w/ hindwing pads)        | M | MI | 153.1 | 646.5  | 761   |
| <b>206622</b> | X11651 | <i>Procloeon</i> sp (w/o hindwing pads)       | M | MI | 165.4 | 534.3  | 534.3 |
| <b>609582</b> | X11670 | <i>Procloeon viridoculare</i>                 | M | MI | 155.3 | 775.5  | 792   |
| <b>101041</b> | X12200 | <i>Isonychia</i> sp                           | M | MI | 236.8 | 471.9  | 549.2 |

|               |        |                                     |   |    |       |        |        |
|---------------|--------|-------------------------------------|---|----|-------|--------|--------|
| <b>100676</b> | X13000 | Leucrocuta sp                       | M | MI | 207.6 | 539.9  | 596.9  |
| <b>100692</b> | X13100 | Nixe sp                             | M | MI | 121.1 | 379.8  | 379.8  |
| <b>100713</b> | X13400 | Stenacron sp                        | M | F  | 243.2 | 918.1  | 944.6  |
| <b>100507</b> | X13500 | Maccaffertium sp                    | M | MI | 90.1  | 132.1  |        |
| <b>100514</b> | X13510 | Maccaffertium exiguum               | M | MI | 155.2 | 254.6  | 225.9  |
| <b>100516</b> | X13521 | Stenonema femoratum                 | M | F  | 270.4 | 478.3  | 471.4  |
| <b>100530</b> | X13540 | Maccaffertium<br>mediopunctatum     | M | MI | 68.4  | 98.5   | 74.1   |
| <b>206616</b> | X13550 | Maccaffertium<br>mexicanum integrum | M | MI | 209.1 | 190.5  | 197.7  |
| <b>100509</b> | X13561 | Maccaffertium<br>pulchellum         | M | MI | 174.6 | 370.7  | 550.3  |
| <b>100542</b> | X13570 | Maccaffertium<br>terminatum         | M | MI | 196   | 239.3  | 244.2  |
| <b>100548</b> | X13590 | Maccaffertium vicarium              | M | MI | 113.3 | 420.2  | 409.5  |
| <b>101095</b> | X14501 | Leptophlebiidae                     | M | MI | 34    | 81.1   |        |
| <b>101108</b> | X14600 | Choroterpes basalis                 | M | MI | 54.5  | 268.6  | 267.6  |
| <b>101122</b> | X14700 | Habrophlebiodes sp                  | M | MI | 54.3  | 94.5   | 105.8  |
| <b>101148</b> | X14900 | Leptophlebia sp                     | M | F  | 32    | 81.8   |        |
| <b>101095</b> | X14950 | small Leptophlebiidae               | M | F  | 102.3 | 865.9  | 400.6  |
| <b>101187</b> | X15000 | Paraleptophlebia sp                 | M | F  | 129.5 | 436.4  | 440    |
| <b>101232</b> | X15501 | Ephemerellidae                      | M | MI | 77.3  | 187.6  |        |
| <b>101324</b> | X16200 | Eurylophella sp                     | M | MI | 60.6  | 310.1  | 316.5  |
| <b>101395</b> | X16300 | Teloganopsis sp                     | M | I  | 43.5  |        |        |
| <b>101396</b> | X16324 | Teloganopsis deficiens              | M | I  | 68.4  | 115.5  | 149.6  |
| <b>101405</b> | X16700 | Tricorythodes sp                    | M | MI | 230.5 | 938    | 884.6  |
| <b>101472</b> | X17103 | Sparbarus lacustris                 | M | MI | 26.6  | 26.7   |        |
| <b>101478</b> | X17200 | Caenis sp                           | M | F  | 302.8 | 1005.5 | 1034   |
| <b>101494</b> | X17600 | Baetisca sp                         | M | MI | 52.2  | 471.5  | 474.8  |
| <b>568559</b> | X18100 | Anthopotamus sp                     | M | MI | 137.3 | 163.1  | 149.7  |
| <b>101526</b> | X18600 | Ephemera sp                         | M | MI | 105.1 | 289.8  | 289.8  |
| <b>101535</b> | X18630 | Ephemera varia                      | M | MI | 77.6  | 96.9   | 84.8   |
| <b>101537</b> | X18700 | Hexagenia sp                        | M | F  | 128.7 | 666.2  | 779.4  |
| <b>101538</b> | X18708 | Hexagenia bilineata                 | M | F  | 137.4 | 613.1  | 299.9  |
| <b>101552</b> | X18750 | Hexagenia limbata                   | M | F  | 122.9 | 674.9  | 748.8  |
| <b>102043</b> | X21001 | Calopterygidae                      | O | F  | 200.3 | 650.3  | 631.3  |
| <b>102052</b> | X21200 | Calopteryx sp                       | O | F  | 303.7 | 1299.2 | 1315.1 |
| <b>102048</b> | X21300 | Hetaerina sp                        | O | F  | 255.3 | 1414.7 | 1464.4 |
| <b>102060</b> | X21604 | Archilestes grandis                 | O | T  | 327   | 396.9  |        |
| <b>102077</b> | X22001 | Coenagrionidae                      | O | T  | 306.1 | 1279.5 | 1331.5 |
| <b>102139</b> | X22300 | Argia sp                            | O | F  | 305.1 | 1293.9 | 1351.4 |
| <b>101603</b> | X23600 | Aeshna sp                           | O | MT | 277.2 | 1154.5 | 990.9  |

|        |        |                                 |   |    |       |        |        |
|--------|--------|---------------------------------|---|----|-------|--------|--------|
| 101597 | X23700 | Anax sp                         | O | MT | 222.7 | 276.6  |        |
| 101598 | X23704 | Anax junius                     | O | MT | 165.2 | 181.4  |        |
| 101649 | X23804 | Basiaeschna janata              | O | F  | 174.1 | 967.1  | 937.8  |
| 101646 | X23905 | Boyeria grafiana                | O | MI | 262.1 | 354.7  | 379.2  |
| 101647 | X23909 | Boyeria vinosa                  | O | F  | 273.4 | 1119.4 | 1055   |
| 101654 | X24107 | Nasiaeschna pentacantha         | O | MT | 188.6 | 201.6  |        |
| 101664 | X24501 | Gomphidae                       | O | F  | 96.1  | 234.7  | 387.8  |
| 101730 | X24700 | Dromogomphus sp                 | O | F  | 58    | 943.9  |        |
| 101665 | X24900 | Gomphus Complex                 | O | F  | 206   | 1305.7 | 1290   |
| 101735 | X25010 | Hagenius brevistylus            | O | F  | 83    | 637.1  | 826.3  |
| 101768 | X25210 | Lanthus parvulus                | O | MI | 44.2  | 169.3  |        |
| 101738 | X25300 | Ophiogomphus sp                 | O | MI | 71.5  | 258.1  | 494.7  |
| 101720 | X25410 | Progomphus obscurus             | O | MT | 92.1  | 492.9  | 487.9  |
| 101762 | X25510 | Stylogomphus albistylus         | O | MI | 156.5 | 586.1  | 758.4  |
| 206626 | X25600 | Stylurus sp                     | O | MI | 54.7  | 494.5  | 613.9  |
| 102027 | X26100 | Cordulegaster sp                | O | F  | 138   | 840    | 622.8  |
| 102031 | X26120 | Cordulegaster maculata          | O | F  | 25.6  | 485.3  | 566.7  |
| 101852 | X26600 | Didymops transversa             | O | MT | 139.6 | 468.2  | 461.4  |
| 101918 | X26700 | Macromia sp                     | O | MI | 167.6 | 908.4  | 875    |
| 102020 | X27001 | Corduliidae                     | O | NA | 120.9 | 319    | 253.9  |
| 206629 | X27307 | Epitheca (Epicordulia) princeps | O | MT | 181.8 | 441.8  | 471.3  |
| 101880 | X27340 | Helocordulia uhleri             | O | F  | 25.7  | 213.7  | 218.9  |
| 101934 | X27400 | Neurocordulia sp                | O | F  | 127   | 259.1  | 303.5  |
| 101947 | X27500 | Somatochlora sp                 | O | MT | 206.9 | 714    | 714    |
| 102035 | X27600 | Epitheca (Tetragoneuria) sp     | O | MT | 121.1 | 99.9   |        |
| 101797 | X28001 | Libellulidae                    | O | MT | 164.8 | 967.7  | 989.1  |
| 101866 | X28208 | Erythemis simplicicollis        | O | MT | 146.5 | 163.9  |        |
| 101893 | X28500 | Libellula sp                    | O | MT | 190.1 | 881.8  | 1176.7 |
| 101799 | X28705 | Pachydiplax longipennis         | O | T  | 80.2  | 84.1   |        |
| 101804 | X28908 | Perithemis tenera               | O | T  | 82.1  | 104.6  |        |
| 101809 | X28955 | Plathemis lydia                 | O | T  | 133   | 593.6  | 509.1  |
| 101976 | X29000 | Sympetrum sp                    | O | T  | 82.7  | 119.9  |        |
| 101979 | X29020 | Sympetrum vicinum               | O | T  | 107   |        |        |
| 102471 | X30800 | Pteronarcys sp                  | S | MI | 79.9  | 87.3   |        |
| 102540 | X32200 | Amphinemura sp                  | S | MI | 73    | 385.1  |        |
| 102844 | X33100 | Leuctra sp                      | S | MI | 184.1 | 971.5  | 962.1  |
| 102914 | X34001 | Perlidae                        | S | NA | 39.1  |        |        |
| 102917 | X34100 | Acroneuria sp                   | S | MI | 110.5 | 311.2  | 369.8  |
| 102922 | X34120 | Acroneuria carolinensis         | S | MI | 111.1 | 460.2  | 419.8  |
| 609897 | X34130 | Acroneuria frisoni              | S | MI | 101   | 686.3  | 675.7  |

|               |        |                                     |   |    |       |        |        |
|---------------|--------|-------------------------------------|---|----|-------|--------|--------|
| <b>102925</b> | X34140 | Acroneuria internata                | S | MI | 71    | 328.8  |        |
| <b>102918</b> | X34150 | Acroneuria lycorias                 | S | I  | 29.6  | 104.5  | 107.7  |
| <b>102942</b> | X34300 | Neoperla sp                         | S | I  | 95.9  | 356    | 362.8  |
| <b>102968</b> | X34410 | Paragnetina media                   | S | MI | 66.3  | 103.9  |        |
| <b>103251</b> | X34500 | Perlesta sp                         | S | F  | 95.3  | 801.3  | 766    |
| <b>103244</b> | X34600 | Perlinella sp                       | S | MI | 89.8  | 119.1  |        |
| <b>103246</b> | X34605 | Perlinella drymo                    | S | MI | 128.9 | 159.5  | 167.4  |
| <b>102975</b> | X34700 | Agnetina sp                         | S | MI | 111.6 | 165.9  | 114.8  |
| <b>102979</b> | X34710 | Agnetina capitata                   | S | MI | 164.4 | 148.2  | 153    |
| <b>102984</b> | X34715 | Agnetina flavescens                 | S | I  | 74.3  | 104.6  |        |
| <b>103273</b> | X36500 | Sweltsa sp                          | S | MI | 82.7  | 414    | 414    |
| <b>103684</b> | X42700 | Belostoma sp                        | O | T  | 230.1 | 665.9  | 718.8  |
| <b>103766</b> | X43205 | Nepa apiculata                      | O | MT | 115.9 | 238.1  |        |
| <b>103748</b> | X43300 | Ranatra sp                          | O | F  | 193.2 | 541.4  | 648    |
| <b>103603</b> | X43570 | Neoplea sp                          | O | F  | 199.6 | 781    | 604.5  |
| <b>103665</b> | X44300 | Pelocoris sp                        | O | MT | 148.6 | 550.9  |        |
| <b>103364</b> | X44501 | Corixidae                           | O | F  | 156.8 | 845.5  | 872    |
| <b>103444</b> | X45000 | Hesperocorixa sp                    | O | T  | 78.7  | 417.6  |        |
| <b>103491</b> | X45100 | Palmacorixa sp                      | O | F  | 209.5 | 939.4  | 838.4  |
| <b>103369</b> | X45300 | Sigara sp                           | O | MT | 245.6 | 889.5  | 755.3  |
| <b>103423</b> | X45400 | Trichocorixa sp                     | O | MT | 197.7 | 864.5  | 990.1  |
| <b>103558</b> | X45900 | Notonecta sp                        | O | T  | 300   | 961.2  | 789    |
| <b>115002</b> | X47600 | Sialis sp                           | O | MT | 190.6 | 1288   | 1296.8 |
| <b>115024</b> | X48200 | Chauliodes sp                       | O | MT | 120.9 | 426.5  |        |
| <b>115025</b> | X48220 | Chauliodes rastricornis             | O | T  | 113.4 | 103.7  |        |
| <b>115034</b> | X48410 | Corydalus cornutus                  | O | MI | 108.9 | 865.4  | 901.9  |
| <b>115028</b> | X48600 | Nigronia sp                         | O | F  | 95.7  | 420.5  |        |
| <b>666581</b> | X48610 | Nigronia fasciata                   | O | MI | 147.4 | 573.6  | 567.3  |
| <b>115031</b> | X48620 | Nigronia serricornis                | O | F  | 130.6 | 1134.2 | 1067.7 |
| <b>115085</b> | X49101 | Sisyridae                           | O | F  | 157   | 114.3  |        |
| <b>115087</b> | X49200 | Climacia areolaris                  | O | F  | 200   | 365.1  | 397    |
| <b>115090</b> | X49400 | Sisyr sp                            | O | F  | 124.7 | 170.1  | 109.8  |
| <b>115278</b> | X50301 | Chimarra aterrima                   | C | MI | 285.6 | 1308.3 | 1158.2 |
| <b>115276</b> | X50315 | Chimarra obscura                    | C | MI | 287.6 | 1107.3 | 1049.8 |
| <b>115322</b> | X50410 | Dolophilodes distinctus             | C | MI | 207.5 | 209    | 270    |
| <b>115392</b> | X50804 | Lype diversa                        | C | MI | 144.5 | 1026.2 | 926.4  |
| <b>115341</b> | X50906 | Psychomyia flava                    | C | MI | 179.7 | 145.6  | 161.6  |
| <b>598193</b> | X51100 | Cernotina sp or<br>Holocentropus sp | C | MI | 50.7  | 548.9  | 564.7  |
| <b>117092</b> | X51206 | Cyrnellus fraternus                 | C | F  | 158.6 | 661.8  | 809.9  |
| <b>117095</b> | X51300 | Neureclipsis sp                     | C | MI | 180.3 | 466.7  | 745.3  |

|               |        |                             |   |    |       |        |        |
|---------------|--------|-----------------------------|---|----|-------|--------|--------|
| <b>117104</b> | X51400 | Nyctiophylax sp             | C | MI | 172.7 | 1040.1 | 966.1  |
| <b>115361</b> | X51500 | Phylocentropus sp           | C | F  | 107   | 159.8  | 176.2  |
| <b>568776</b> | X51550 | Plectrocnemia sp            | C | MI | 328.9 | 127.9  |        |
| <b>117043</b> | X51600 | Polycentropus group         | C | MI | 205.7 | 1310.1 | 1298.7 |
| <b>115408</b> | X52200 | Cheumatopsyche sp           | C | F  | 305.1 | 1274.7 | 1306.5 |
| <b>115402</b> | X52315 | Diplectrona modesta         | C | F  | 155.4 | 532.2  | 530.4  |
| <b>115570</b> | X52430 | Ceratopsyche morosa group   | C | MI | 289.9 | 1310.7 | 1358.8 |
| <b>115586</b> | X52440 | Ceratopsyche slossonae      | C | MI | 174.1 | 1242   | 1242   |
| <b>115589</b> | X52450 | Ceratopsyche sparna         | C | F  | 291.8 | 141.6  |        |
| <b>115456</b> | X52510 | Hydropsyche aerata          | C | MI | 132.5 | 143.5  | 138    |
| <b>115458</b> | X52520 | Hydropsyche bidens          | C | MI | 165.5 | 110.9  |        |
| <b>115453</b> | X52530 | Hydropsyche depravata group | C | F  | 305.6 | 1300.5 | 1322.8 |
| <b>115465</b> | X52540 | Hydropsyche dicantha        | C | MI | 157.9 | 785.2  | 762.3  |
| <b>115468</b> | X52550 | Hydropsyche frisoni         | C | MI | 86.7  | 647.3  | 663.5  |
| <b>115485</b> | X52560 | Hydropsyche orris           | C | MI | 160.9 | 275.4  | 294.8  |
| <b>115481</b> | X52570 | Hydropsyche simulans        | C | MI | 171.7 | 378.8  | 361.9  |
| <b>115482</b> | X52580 | Hydropsyche valanis         | C | MI | 132.4 | 125.8  | 139    |
| <b>115484</b> | X52590 | Hydropsyche venularis       | C | MI | 114.9 | 541    |        |
| <b>115606</b> | X52620 | Macrostemum zebratum        | C | I  | 95.1  | 127.4  | 134.7  |
| <b>115552</b> | X52801 | Potamyia flava              | C | MI | 91    | 97.6   |        |
| <b>117159</b> | X53300 | Glossosoma sp               | C | MI | 94.9  | 234.4  | 257.6  |
| <b>115221</b> | X53400 | Protoptila sp               | C | I  | 181.2 | 185    | 137.4  |
| <b>115629</b> | X53501 | Hydroptilidae               | C | F  | 233.6 | 777.6  | 840.2  |
| <b>115641</b> | X53800 | Hydroptila sp               | C | F  | 289.7 | 1306.8 | 1338   |
| <b>115631</b> | X54000 | Leucotrichia pictipes       | C | MI | 145.5 | 67.2   |        |
| <b>115833</b> | X54100 | Neotrichia sp               | C | F  | 23.7  | 1067.5 | 1102.6 |
| <b>115714</b> | X54160 | Ochrotrichia sp             | C | MI | 201.5 | 575.6  | 680    |
| <b>115828</b> | X54200 | Orthotrichia sp             | C | F  | 155   | 259    |        |
| <b>115779</b> | X54300 | Oxyethira sp                | C | F  | 147.9 | 347.9  |        |
| <b>115902</b> | X55107 | Oligostomis pardalis        | C | F  | 26.7  | 422.1  | 405.8  |
| <b>115868</b> | X55300 | Ptilostomis sp              | C | F  | 183.2 | 594.1  | 640    |
| <b>116910</b> | X55520 | Brachycentrus numerosus     | C | MI | 144.8 | 168.7  | 178    |
| <b>116046</b> | X57400 | Neophylax sp                | C | MI | 153.5 | 324.1  | 326.3  |
| <b>116409</b> | X57900 | Pycnopsyche sp              | C | MI | 188   | 1306.6 | 1286   |
| <b>116794</b> | X58020 | Lepidostoma sp              | C | MI | 71.3  | 146.1  | 148.4  |
| <b>117020</b> | X58505 | Helicopsyche borealis       | C | MI | 204.3 | 523.8  | 539.8  |
| <b>116547</b> | X59001 | Leptoceridae                | C | MI | 121.6 | 254.8  |        |
| <b>116684</b> | X59100 | Ceraclea sp                 | C | MI | 198.3 | 140.1  |        |
| <b>116696</b> | X59110 | Ceraclea ancylus            | C | MI | 88.3  | 299.8  | 308.9  |

|               |        |                                                      |   |    |       |        |        |
|---------------|--------|------------------------------------------------------|---|----|-------|--------|--------|
| <b>116684</b> | X59120 | Ceraclea flava or C. neffi                           | C | MI | 56.2  | 239.5  | 260.6  |
| <b>116725</b> | X59140 | Ceraclea maculata                                    | C | MI | 84.6  | 137    |        |
| <b>116684</b> | X59150 | Ceraclea resurgens or C. transversa                  | C | F  | 124.2 | 134.9  |        |
| <b>116729</b> | X59160 | Ceraclea spongillovorax                              | C | MI | 145.2 | 278.6  |        |
| <b>116598</b> | X59300 | Mystacides sp                                        | C | MI | 224   | 365.5  | 401.2  |
| <b>116599</b> | X59310 | Mystacides sepulchralis                              | C | MI | 189.5 | 269    | 281.9  |
| <b>116651</b> | X59400 | Nectopsyche sp                                       | C | MI | 127.6 | 572.3  |        |
| <b>116661</b> | X59407 | Nectopsyche candida                                  | C | MI | 154   | 186.7  | 196.4  |
| <b>116663</b> | X59410 | Nectopsyche diarina                                  | C | MI | 180   | 704.9  | 948.8  |
| <b>116659</b> | X59415 | Nectopsyche exquisita                                | C | MI | 160.2 | 123.9  |        |
| <b>116607</b> | X59500 | Oecetis sp                                           | C | F  | 130.5 | 660.5  | 756.1  |
| <b>116608</b> | X59510 | Oecetis avara                                        | C | I  | 89.4  | 442.5  | 658.8  |
| <b>116609</b> | X59520 | Oecetis cinerascens                                  | C | F  | 126.2 | 290.1  |        |
| <b>116613</b> | X59550 | Oecetis inconspicua complex sp A (sensu Floyd, 1995) | C | F  | 141.3 | 110.3  |        |
| <b>116613</b> | X59555 | Oecetis inconspicua complex sp F (sensu Floyd, 1995) | C | F  | 157.3 | 129.5  |        |
| <b>116631</b> | X59570 | Oecetis nocturna                                     | C | F  | 199.7 | 376.8  | 349.6  |
| <b>116636</b> | X59580 | Oecetis persimilis                                   | C | MI | 97.4  | 478.3  | 476.3  |
| <b>116565</b> | X59700 | Triaenodes sp                                        | C | MI | 103.8 | 539.8  | 534.7  |
| <b>116571</b> | X59720 | Triaenodes ignitus                                   | C | MI | 174.3 | 596.2  | 592.7  |
| <b>116572</b> | X59724 | Triaenodes injustus                                  | C | MI | 149.6 | 407.6  | 443.6  |
| <b>116575</b> | X59728 | Triaenodes marginatus                                | C | F  | 132.8 | 510.3  | 611.8  |
| <b>116593</b> | X59730 | Triaenodes melaca                                    | C | MI | 139.1 | 591.6  | 577.1  |
| <b>206644</b> | X59740 | Triaenodes perna                                     | C | MI | 75.8  | 161.1  | 211.9  |
| <b>117714</b> | X59950 | Parapoynx sp                                         | O | MI | 88.9  | 401.4  |        |
| <b>117682</b> | X59970 | Petrophila sp                                        | O | MI | 201.6 | 555.6  | 435.9  |
| <b>112711</b> | X60300 | Dineutus sp                                          | O | F  | 130.8 | 845.8  | 867.6  |
| <b>112654</b> | X60400 | Gyrinus sp                                           | O | F  | 150.1 | 1042.1 | 1017.6 |
| <b>111858</b> | X60800 | Haliphus sp                                          | O | MT | 201.1 | 1077.5 | 1291.2 |
| <b>111923</b> | X60900 | Peltodytes sp                                        | O | MT | 246.4 | 978    | 1014.5 |
| <b>112074</b> | X61100 | Acilius sp                                           | O | T  | 108   | 141.1  |        |
| <b>111966</b> | X61400 | Agabus sp                                            | O | T  | 92.4  | 683.3  | 990.9  |
| <b>112561</b> | X62200 | Copelatus sp                                         | O | MT | 142.7 | 95.6   |        |
| <b>111963</b> | X63300 | Hydroporini                                          | O | T  | 280.8 | 1133   | 1056.5 |
| <b>112200</b> | X63600 | Hygrotus sp                                          | O | MT | 185.6 |        |        |
| <b>112181</b> | X63700 | Ilybius sp                                           | O | T  | 86.1  | 1007.9 |        |
| <b>112278</b> | X63900 | Laccophilus sp                                       | O | T  | 296.5 | 1049.3 | 977.9  |
| <b>112580</b> | X64050 | Liodessus sp                                         | O | MT | 161.4 | 725.1  | 872.4  |



|               |        |                          |   |    |       |        |        |
|---------------|--------|--------------------------|---|----|-------|--------|--------|
| <b>112575</b> | X64800 | Uvarus sp                | O | MT | 138.8 | 367.6  | 798.4  |
| <b>112811</b> | X65501 | Hydrophilidae            | O | F  | 94.6  | 937.7  | 1069.3 |
| <b>112878</b> | X65700 | Anacaena sp              | O | MT | 155   | 260.5  | 264.3  |
| <b>112812</b> | X65800 | Berosus sp               | O | MT | 319   | 949.3  | 992.8  |
| <b>113017</b> | X66200 | Cymbiodyta sp            | O | MT | 101.9 | 619.6  | 632.3  |
| <b>112973</b> | X66500 | Enochrus sp              | O | MT | 251.2 | 853.9  | 847.3  |
| <b>113149</b> | X66901 | Helocombus bifidus       | O | MT | 177.8 | 107.2  |        |
| <b>113106</b> | X67000 | Helophorus sp            | O | MT | 174.7 | 384.6  | 423.9  |
| <b>113196</b> | X67100 | Hydrobius sp             | O | F  | 104   | 570.9  | 574.2  |
| <b>113166</b> | X67300 | Hydrochus sp             | O | MT | 157.7 | 438.3  | 265.9  |
| <b>112858</b> | X67500 | Laccobius sp             | O | F  | 145.1 | 906.2  | 871.3  |
| <b>112909</b> | X67700 | Paracymus sp             | O | MT | 165.1 | 661.9  | 894.6  |
| <b>112932</b> | X67750 | Sperchopsis tessellatus  | O | F  | 106.1 | 390.9  | 458.1  |
| <b>112938</b> | X67800 | Tropisternus sp          | O | T  | 303.7 | 950    | 951.5  |
| <b>114087</b> | X68025 | Ectopria sp              | O | F  | 225.9 | 637    | 650    |
| <b>114072</b> | X68075 | Psephenus herricki       | O | MI | 243.4 | 952    | 970.3  |
| <b>114006</b> | X68130 | Helichus sp              | O | F  | 243.8 | 1001.4 | 1012.5 |
| <b>113924</b> | X68201 | Scirtidae                | O | F  | 202.4 | 1137.1 | 1187   |
| <b>113948</b> | X68300 | Cyphon sp                | O | MT | 147.7 | 440.4  | 320    |
| <b>114194</b> | X68601 | Ancyronyx variegatus     | O | F  | 246.3 | 917.9  | 892.4  |
| <b>114126</b> | X68700 | Dubiraphia sp            | O | F  | 161.8 | 792.2  | 691.6  |
| <b>114129</b> | X68702 | Dubiraphia bivittata     | O | F  | 216   | 478.6  |        |
| <b>114130</b> | X68707 | Dubiraphia quadrinotata  | O | F  | 173.3 | 875.2  | 792.9  |
| <b>114126</b> | X68708 | Dubiraphia vittata group | O | F  | 277.5 | 1301.3 | 1323.2 |
| <b>114213</b> | X68901 | Macronychus glabratus    | O | F  | 242.3 | 1128.3 | 1053.5 |
| <b>114177</b> | X69200 | Optioservus sp           | O | MI | 118.5 | 218.4  | 227.2  |
| <b>114185</b> | X69210 | Optioservus ovalis       | O | MI | 92.9  | 474.8  | 491.7  |
| <b>114190</b> | X69225 | Optioservus fastiditus   | O | MI | 159   | 531.9  | 571.6  |
| <b>114186</b> | X69275 | Optioservus trivittatus  | O | MI | 117.4 | 600.2  | 672.3  |
| <b>114095</b> | X69400 | Stenelmis sp             | O | F  | 302.8 | 1292.1 | 1321.8 |
| <b>114113</b> | X69420 | Stenelmis sexlineata     | O | NA | 152   | 186.3  |        |
| <b>114038</b> | X69713 | Lutrochus laticeps       | O | MI | 69.5  | 452.8  |        |
| <b>113835</b> | X69930 | Lampyridae               | O | F  | 54    | 621    |        |
| <b>118840</b> | X70501 | Tipulidae                | D | NA | 57.1  | 68.3   |        |
| <b>119654</b> | X70502 | Limoniinae               | D | NA | 112.9 | 624.7  |        |
| <b>119656</b> | X70600 | Antocha sp               | D | MI | 309.7 | 721.1  | 689.8  |
| <b>121027</b> | X70700 | Dicranota sp             | D | MI | 149.9 | 943    | 1018.1 |
| <b>120094</b> | X71100 | Hexatoma sp              | D | MI | 235.9 | 1139.8 | 1160   |
| <b>120165</b> | X71200 | Limnophila sp            | D | MI | 45.1  | 310.6  |        |
| <b>119704</b> | X71300 | Limonia sp               | D | F  | 216.8 | 304.6  | 319.1  |
| <b>120830</b> | X71500 | Ormosia sp               | D | MT | 65.1  |        |        |

|               |        |                                         |   |    |       |        |        |
|---------------|--------|-----------------------------------------|---|----|-------|--------|--------|
| <b>120335</b> | X71700 | Pilaria sp                              | D | F  | 149.6 | 752.2  | 883.9  |
| <b>120365</b> | X71800 | Pseudolimnophila sp                     | D | MI | 81.3  | 383.9  | 249.5  |
| <b>119037</b> | X71900 | Tipula sp                               | D | F  | 306.9 | 1085.4 | 1067.2 |
| <b>119041</b> | X71910 | Tipula abdominalis                      | D | F  | 158.7 | 724.5  | 711.7  |
| <b>125810</b> | X72330 | Dixa sp                                 | D | F  | 19.3  | 184.7  | 179.6  |
| <b>125854</b> | X72340 | Dixella sp                              | D | F  | 144.4 | 809.3  | 627.9  |
| <b>125904</b> | X72420 | Chaoborus sp                            | D | T  | 79.2  | 88.7   |        |
| <b>125930</b> | X72501 | Culicidae                               | D | MT | 69    | 72.8   |        |
| <b>126234</b> | X72600 | Aedes sp                                | D | T  | 110.1 | 69.3   |        |
| <b>125956</b> | X72700 | Anopheles sp                            | D | F  | 294   | 1293.7 | 1297.3 |
| <b>126455</b> | X72900 | Culex sp                                | D | T  | 162.6 | 248.7  | 359.5  |
| <b>126774</b> | X74100 | Simulium sp                             | D | F  | 270   | 1125   | 1070.8 |
| <b>127076</b> | X74501 | Ceratopogonidae                         | D | T  | 222.2 | 1292.8 | 1339.6 |
| <b>127113</b> | X74650 | Atrichopogon sp                         | D | F  | 66.2  | 271.6  | 332.4  |
| <b>127150</b> | X74673 | Atrichopogon websteri                   | D | F  | 73    | 253.9  | 285.6  |
| <b>127994</b> | X77001 | Tanypodinae                             | D | NA | 55.3  |        |        |
| <b>128079</b> | X77100 | Ablabesmyia sp                          | D | NA | 94.5  | 172.1  |        |
| <b>128081</b> | X77110 | Ablabesmyia annulata                    | D | F  | 71.3  | 102.2  | 102.9  |
| <b>128093</b> | X77115 | Ablabesmyia janta                       | D | F  | 127.5 | 216.8  | 276.8  |
| <b>128097</b> | X77120 | Ablabesmyia mallochi                    | D | F  | 305.9 | 1273.2 | 1315.9 |
| <b>128079</b> | X77130 | Ablabesmyia rhamphe group               | D | MT | 168.4 | 828.2  | 1026.4 |
| <b>128113</b> | X77140 | Ablabesmyia peleensis                   | D | NA | 131   | 165.6  |        |
| <b>128123</b> | X77150 | Ablabesmyia simpsoni                    | D | F  | 121.7 | 500.1  |        |
| <b>127998</b> | X77355 | Clinotanypus pinguis                    | D | MT | 164.4 | 897.6  | 981.8  |
| <b>128130</b> | X77500 | Conchapelopia sp                        | D | F  | 305.3 | 1291.6 | 1151.5 |
| <b>128249</b> | X77740 | Thienemannimyia (Hayesomyia) senata     | D | F  | 135.8 | 551.3  | 624.4  |
| <b>127994</b> | X77750 | Thienemannimyia sp                      | D | F  | 248.3 | 808.3  | 857.4  |
| <b>128131</b> | X77800 | Helopelopia sp                          | D | F  | 303.8 | 685    | 762.3  |
| <b>128174</b> | X78101 | Labrundinia becki                       | D | F  | 46.3  | 207.1  |        |
| <b>128177</b> | X78130 | Labrundinia neopilosella                | D | NA | 64.8  | 233.6  |        |
| <b>128178</b> | X78140 | Labrundinia pilosella                   | D | F  | 151.6 | 825.5  | 815.9  |
| <b>128183</b> | X78200 | Larsia sp                               | D | MT | 110.1 | 263.1  | 349.2  |
| <b>128132</b> | X78350 | Meropelopia sp                          | D | F  | 191.7 | 753.5  | 753.5  |
| <b>128070</b> | X78400 | Natarsia sp                             | D | F  | 143   | 289.6  |        |
| <b>128070</b> | X78401 | Natarsia species A (sensu Roback, 1978) | D | T  | 243.6 | 759.2  | 909.3  |
| <b>128071</b> | X78402 | Natarsia baltimoreus                    | D | F  | 150   | 221.1  | 206.5  |
| <b>128203</b> | X78450 | Nilotanypus fimbriatus                  | D | F  | 254.5 | 452    | 471.4  |
| <b>128209</b> | X78500 | Zavreliomyia (Paramerina) fragilis      | D | F  | 158.4 | 385.9  | 418.9  |

|               |        |                                           |   |    |       |        |        |
|---------------|--------|-------------------------------------------|---|----|-------|--------|--------|
| <b>128216</b> | X78600 | Pentaneura inconspicua                    | D | F  | 127.1 | 991    | 1471.6 |
| <b>599368</b> | X78601 | Pentaneura inyoensis                      | D | F  | 184.2 | 910.2  | 566.1  |
| <b>128277</b> | X78650 | Procladius sp                             | D | MT | 131.1 | 812.3  |        |
| <b>128277</b> | X78655 | Procladius (Holotanypus) sp               | D | MT | 273.5 | 1278   | 1331.9 |
| <b>128285</b> | X78680 | Procladius (Psilotanypus) bellus          | D | MT | 100.3 | 254.4  |        |
| <b>128056</b> | X78702 | Psectrotanypus dyari                      | D | VT | 187.5 | 120.8  |        |
| <b>128229</b> | X78750 | Rheopelopia paramaculipennis              | D | MI | 133.8 | 160.7  |        |
| <b>128329</b> | X79020 | Tanypus neopunctipennis                   | D | T  | 176.3 | 1370.3 |        |
| <b>128333</b> | X79030 | Tanypus punctipennis (sensu Roback, 1977) | D | T  | 51.4  | 888.2  |        |
| <b>128234</b> | X79085 | Telopelopia okoboji                       | D | MI | 112.8 | 147    |        |
| <b>127994</b> | X79100 | Thienemannimyia group                     | D | F  | 164.3 | 219.1  |        |
| <b>128252</b> | X79300 | Trissopelopia ogemawi                     | D | MI | 67.7  | 194.7  | 171.8  |
| <b>128259</b> | X79400 | Zavreliomyia (Z.) sp                      | D | F  | 162.9 | 606.2  | 424.5  |
| <b>128355</b> | X79720 | Diamesa sp                                | D | F  | 224.7 | 659.1  | 683.9  |
| <b>128477</b> | X80204 | Brillia flavifrons group                  | D | F  | 136.3 | 392.1  | 422.4  |
| <b>128515</b> | X80310 | Cardiocladius obscurus                    | D | MI | 202.3 | 168.6  | 222.9  |
| <b>128563</b> | X80350 | Corynoneura sp                            | D | MI | 80.8  | 93.5   |        |
| <b>128563</b> | X80351 | Corynoneura caudicula                     | D | F  | 159.7 | 215.1  | 218.2  |
| <b>128563</b> | X80360 | Corynoneura floridaensis                  | D | MI | 120.3 | 192.1  | 163.9  |
| <b>128563</b> | X80363 | Corynoneura sp. 12                        | D | MI | 165.1 | 87.1   |        |
| <b>128567</b> | X80370 | Corynoneura lobata                        | D | F  | 164.2 | 649.5  | 601.5  |
| <b>128575</b> | X80400 | Cricotopus sp                             | D | F  | 75.4  | 184.6  |        |
| <b>128575</b> | X80410 | Cricotopus (C.) sp                        | D | F  | 232.9 | 1045.7 | 1061.8 |
| <b>128578</b> | X80415 | Cricotopus (Isocladius) absurdus          | D | MI | 50.4  | 133    |        |
| <b>128583</b> | X80420 | Cricotopus (C.) bicinctus                 | D | T  | 295.4 | 1299.4 | 1292.1 |
| <b>128640</b> | X80427 | Cricotopus (C.) politus                   | D | MI | 74.6  | 428.8  |        |
| <b>128575</b> | X80430 | Cricotopus (C.) tremulus group            | D | MT | 317.2 | 1169.4 | 1064.4 |
| <b>128659</b> | X80440 | Cricotopus (C.) trifascia                 | D | F  | 233.4 | 967.4  | 896.5  |
| <b>128575</b> | X80510 | Cricotopus (Isocladius) sylvestris group  | D | T  | 331.6 | 640.6  |        |
| <b>128681</b> | X80570 | Doncricotopus bicaudatus                  | D | F  | 101.7 | 278.1  |        |
| <b>128689</b> | X80710 | Eukiefferiella brehmi group               | D | MI | 73.2  | 68.2   |        |
| <b>128689</b> | X80720 | Eukiefferiella brevicar group             | D | F  | 97.2  |        |        |

|               |        |                                                          |   |    |       |        |        |
|---------------|--------|----------------------------------------------------------|---|----|-------|--------|--------|
| <b>128689</b> | X80740 | Eukiefferiella claripennis group                         | D | MT | 166.5 | 593.2  |        |
| <b>128689</b> | X80750 | Eukiefferiella devonica group                            | D | F  | 65.6  | 75.8   |        |
| <b>128811</b> | X81060 | Lopescladius sp                                          | D | MI | 69    | 59.9   |        |
| <b>128844</b> | X81200 | Nanocladius sp                                           | D | F  | 185.8 | 120.7  |        |
| <b>128844</b> | X81201 | Nanocladius (N.) sp                                      | D | F  | 58    |        |        |
| <b>128844</b> | X81231 | Nanocladius (N.) crassicornus or N. (N.) \rectinervis\"" | D | F  | 225.8 | 342.1  | 432    |
| <b>128853</b> | X81240 | Nanocladius (N.) distinctus                              | D | MT | 158.6 | 184.2  |        |
| <b>128859</b> | X81250 | Nanocladius (N.) minimus                                 | D | F  | 134.4 | 135.2  |        |
| <b>128862</b> | X81270 | Nanocladius (N.) spiniplenus                             | D | F  | 112.3 | 190.9  | 155.2  |
| <b>128855</b> | X81280 | Nanocladius (Plecopteracoluthus) downesi                 | D | MI | 66.4  | 169.6  | 204.1  |
| <b>128874</b> | X81460 | Orthocladius (O.) sp                                     | D | F  | 128.9 | 233.5  | 257.1  |
| <b>128882</b> | X81465 | Orthocladius (O.) carlatus                               | D | F  | 63.9  | 206.4  |        |
| <b>128913</b> | X81530 | Orthocladius (Symposiocladius) lignicola                 | D | MI | 54.9  | 92.3   |        |
| <b>128968</b> | X81631 | Parakiefferiella n.sp 1                                  | D | F  | 111.5 | 411.3  |        |
| <b>128968</b> | X81632 | Parakiefferiella n.sp 2                                  | D | F  | 150.7 | 1097.7 |        |
| <b>128968</b> | X81633 | Parakiefferiella n.sp 5                                  | D | MI | 104.9 | 463.5  |        |
| <b>128978</b> | X81650 | Parametriocnemus sp                                      | D | F  | 219.5 | 1153.1 | 1162.3 |
| <b>129005</b> | X81690 | Paratrithocladius sp                                     | D | MI | 144.8 | 595.4  | 610    |
| <b>129102</b> | X81825 | Rheocricotopus (Psilocricotopus) robacki                 | D | F  | 248.9 | 1012.5 | 1028.8 |
| <b>129162</b> | X82070 | Synorthocladius semivirens                               | D | F  | 165.1 |        |        |
| <b>129182</b> | X82100 | Thienemanniella sp                                       | D | F  | 176.7 | 306.7  |        |
| <b>129182</b> | X82101 | Thienemanniella taurocapita                              | D | MI | 265.2 | 449.1  | 502.2  |
| <b>129182</b> | X82121 | Thienemanniella lobapodema                               | D | F  | 168.1 | 549.5  | 647.3  |
| <b>129189</b> | X82130 | Thienemanniella similis                                  | D | MI | 185.6 | 195.3  | 138.6  |
| <b>129190</b> | X82141 | Thienemanniella xena                                     | D | F  | 319.2 | 766.7  | 800.9  |
| <b>129197</b> | X82200 | Tvetenia bavarica group                                  | D | MI | 191.2 | 499.3  | 530.6  |
| <b>129197</b> | X82220 | Tvetenia discoloripes group                              | D | MI | 220.6 | 141.2  | 135.5  |
| <b>129209</b> | X82300 | Xylotopus par                                            | D | MI | 146.8 | 298.7  | 278.9  |
| <b>129236</b> | X82600 | Axarus sp                                                | D | F  | 64.4  | 421.7  | 547    |

|               |        |                                                       |   |    |       |        |        |
|---------------|--------|-------------------------------------------------------|---|----|-------|--------|--------|
| <b>129254</b> | X82700 | Chironomus sp                                         | D | MT | 143.6 | 129.8  |        |
| <b>129254</b> | X82710 | Chironomus (C.) sp                                    | D | MT | 227.7 | 286.8  |        |
| <b>129254</b> | X82730 | Chironomus (C.) decorus group                         | D | T  | 307.4 | 1313.9 | 1313.9 |
| <b>129254</b> | X82770 | Chironomus (C.) riparius group                        | D | T  | 198.6 | 194.3  |        |
| <b>129350</b> | X82800 | Cladopelma sp                                         | D | T  | 167   | 954.2  |        |
| <b>129368</b> | X82820 | Cryptochironomus sp                                   | D | F  | 308.4 | 1305.6 | 1331.5 |
| <b>129368</b> | X82822 | Cryptochironomus eminentia                            | D | F  | 95.8  | 121.6  |        |
| <b>129384</b> | X82824 | Cryptochironomus ponderosus                           | D | F  | 217.5 | 456.3  | 628.6  |
| <b>129386</b> | X82826 | Cryptochironomus psittacinus                          | D | F  | 80    | 148.3  |        |
| <b>129394</b> | X82880 | Cryptotendipes sp                                     | D | F  | 57.5  | 337.6  |        |
| <b>129404</b> | X82885 | Cryptotendipes pseudotener                            | D | F  | 194.1 | 1112.2 | 1140.9 |
| <b>129421</b> | X82900 | Demicryptochironomus sp                               | D | MI | 109.8 | 88.9   |        |
| <b>129428</b> | X83000 | Dicrotendipes sp                                      | D | F  | 124.5 | 154.5  |        |
| <b>129448</b> | X83002 | Dicrotendipes modestus                                | D | MT | 277.5 | 335.3  | 428.1  |
| <b>129436</b> | X83003 | Dicrotendipes fumidus                                 | D | F  | 249   | 480.1  | 489.9  |
| <b>129450</b> | X83040 | Dicrotendipes neomodestus                             | D | F  | 293.6 | 1097.2 | 1070   |
| <b>129458</b> | X83050 | Dicrotendipes lucifer                                 | D | MT | 144.7 | 204.4  |        |
| <b>193743</b> | X83051 | Dicrotendipes simpsoni                                | D | T  | 174   | 285.5  |        |
| <b>129471</b> | X83158 | Endochironomus nigricans                              | D | MT | 163.7 | 273.6  | 299.7  |
| <b>129483</b> | X83300 | Glyptotendipes (G.) sp                                | D | MT | 172.5 | 374    | 397.2  |
| <b>129484</b> | X83310 | Glyptotendipes (Heynotendipes) chelonia               | D | MI | 142.7 | 147.2  |        |
| <b>129516</b> | X83400 | Harnischia sp                                         | D | F  | 100.1 |        |        |
| <b>129517</b> | X83410 | Harnischia curtilamellata                             | D | F  | 149.5 | 181.4  | 197.9  |
| <b>129522</b> | X83590 | Kiefferulus sp                                        | D | T  | 46.7  | 162.2  |        |
| <b>129535</b> | X83820 | Microtendipes \caelum\" (sensu Simpson & Bode, 1980)" | D | MI | 209.1 | 645.1  | 646.3  |
| <b>129541</b> | X83840 | Microtendipes pedellus group                          | D | F  | 222.5 | 824.3  | 668.8  |
| <b>129547</b> | X83860 | Microtendipes rydalensis                              | D | MI | 46.9  | 39.4   |        |
| <b>129548</b> | X83900 | Nilothauma sp                                         | D | F  | 105.5 | 311.6  | 247.6  |
| <b>129564</b> | X84000 | Parachironomus sp                                     | D | MT | 151.6 | 155.1  |        |

|               |        |                                                       |   |    |       |        |        |
|---------------|--------|-------------------------------------------------------|---|----|-------|--------|--------|
| <b>129564</b> | X84010 | Parachironomus abortivus (sensu Simpson & Bode, 1980) | D | MT | 59.5  | 113.9  |        |
| <b>129569</b> | X84020 | Parachironomus carinatus                              | D | F  | 84.2  | 174.7  |        |
| <b>129579</b> | X84040 | Parachironomus frequens                               | D | F  | 188.1 | 216    |        |
| <b>129583</b> | X84060 | Parachironomus pectinatellae                          | D | MI | 145.9 | 202.8  | 233.5  |
| <b>129608</b> | X84116 | Paracladopelma nereis                                 | D | F  | 91.8  | 134.4  |        |
| <b>129612</b> | X84118 | Paracladopelma undine                                 | D | MI | 78.3  | 159.3  |        |
| <b>129619</b> | X84155 | Paralauterborniella nigrohalteralis                   | D | F  | 161.3 | 1081.5 | 982.2  |
| <b>129623</b> | X84210 | Paratendipes albimanus or P. duplicatus               | D | F  | 302.8 | 1138   | 1022.8 |
| <b>129647</b> | X84300 | Phaenopsectra obediens group                          | D | F  | 248.7 | 804.4  | 804.4  |
| <b>129652</b> | X84302 | Phaenopsectra punctipes                               | D | F  | 88.4  | 366.2  | 158.8  |
| <b>129642</b> | X84315 | Phaenopsectra flavipes                                | D | MT | 311.8 | 539    | 604.1  |
| <b>129657</b> | X84420 | Polypedilum (P.) n.sp 1                               | D | MI | 79.1  |        |        |
| <b>129657</b> | X84430 | Polypedilum (P.) albicorne                            | D | F  | 232.5 | 495.2  | 523.1  |
| <b>129666</b> | X84440 | Polypedilum (Uresipedilum) aviceps                    | D | MI | 216.2 | 545.4  | 418.2  |
| <b>129671</b> | X84450 | Polypedilum (Uresipedilum) flavum                     | D | F  | 246.1 | 907    | 979    |
| <b>129676</b> | X84460 | Polypedilum (P.) fallax group                         | D | F  | 230   | 711.4  | 635.7  |
| <b>129657</b> | X84469 | Polypedilum (P.) illinoense group                     | D | NA | 133.2 | 142.3  | 152.8  |
| <b>129686</b> | X84470 | Polypedilum (P.) illinoense                           | D | T  | 305.6 | 1286.8 | 1315.7 |
| <b>129701</b> | X84475 | Polypedilum (P.) ophioides                            | D | F  | 175.7 | 354    | 410.5  |
| <b>129692</b> | X84480 | Polypedilum (P.) laetum group                         | D | MI | 170.8 | 375.8  | 214.8  |
| <b>129698</b> | X84490 | Polypedilum (Cerobregma) ontario                      | D | MI | 114.2 | 126.8  |        |
| <b>129657</b> | X84520 | Polypedilum (Tripodura) halterale group               | D | MT | 200.9 | 541.2  | 566.2  |
| <b>129657</b> | X84540 | Polypedilum (Tripodura) scalaenum group               | D | F  | 309.3 | 529.3  | 534.4  |

|               |        |                                              |   |    |       |        |        |
|---------------|--------|----------------------------------------------|---|----|-------|--------|--------|
| <b>129735</b> | X84601 | Saetheria species 1<br>(sensu Jackson, 1977) | D | F  | 112.8 | 770.9  |        |
| <b>129737</b> | X84612 | Saetheria tylus                              | D | F  | 175.1 | 487.4  | 491.1  |
| <b>129746</b> | X84700 | Stenochironomus sp                           | D | F  | 230.6 | 825.8  | 829.7  |
| <b>129785</b> | X84750 | Stictochironomus sp                          | D | F  | 290.6 | 1027.9 | 1053.4 |
| <b>129823</b> | X84790 | Tribelos fuscicorne                          | D | F  | 134.3 | 760.6  | 796.2  |
| <b>129827</b> | X84800 | Tribelos jucundum                            | D | MT | 192.5 | 571.5  | 414.1  |
| <b>129838</b> | X84888 | Xenochironomus<br>xenolabis                  | D | F  | 182.7 | 363.4  | 412.3  |
| <b>129851</b> | X84960 | Pseudochironomus sp                          | D | F  | 132.2 | 307.9  | 758.5  |
| <b>129873</b> | X85200 | Cladotanytarsus sp                           | T | F  | 146.9 | 429.4  |        |
| <b>129873</b> | X85201 | Cladotanytarsus species<br>group A           | T | F  | 184.3 | 529.5  | 555.8  |
| <b>129873</b> | X85230 | Cladotanytarsus mancus<br>group              | T | F  | 215.5 | 829.1  | 782.7  |
| <b>129873</b> | X85261 | Cladotanytarsus<br>vanderwulpi               | T | MI | 129.1 | 348    | 386.1  |
| <b>129873</b> | X85263 | Cladotanytarsus<br>vanderwulpi group sp 3    | T | MI | 65    | 174.9  |        |
| <b>129873</b> | X85264 | Cladotanytarsus<br>vanderwulpi group sp 4    | T | MI | 111   | 375.3  | 379.9  |
| <b>129873</b> | X85265 | Cladotanytarsus<br>vanderwulpi group sp 5    | T | MI | 169.8 | 169.9  | 185.2  |
| <b>129890</b> | X85400 | Micropsectra sp                              | T | MT | 155.2 | 361.4  | 679.7  |
| <b>129935</b> | X85500 | Paratanytarsus sp                            | T | F  | 272   | 1032   | 1055.8 |
| <b>129935</b> | X85501 | Paratanytarsus longistilus                   | T | MI | 160.9 | 449.9  | 475.1  |
| <b>129959</b> | X85615 | Rheotanytarsus<br>pellucidus                 | T | MI | 215.5 | 848.3  | 856.1  |
| <b>129952</b> | X85625 | Rheotanytarsus sp                            | T | F  | 290.8 | 1003.1 | 1051.3 |
| <b>129969</b> | X85711 | Stempellinella<br>leptocelloides             | T | MI | 86.7  | 326.6  | 332.5  |
| <b>129969</b> | X85720 | Stempellinella fimbriata                     | T | MI | 115.2 | 230.8  | 223    |
| <b>129976</b> | X85752 | Sublettea coffmani                           | T | MI | 127.7 | 352.8  | 438    |
| <b>129978</b> | X85800 | Tanytarsus sp                                | T | F  | 300.5 | 1307.1 | 1342.3 |
| <b>129978</b> | X85801 | Tanytarsus sp 1                              | T | F  | 26.3  | 160.3  | 162.4  |
| <b>129985</b> | X85802 | Tanytarsus n. sp. near<br>curticornis        | T | F  | 119.6 | 435.2  | 375.9  |
| <b>129978</b> | X85814 | Tanytarsus glabrescens<br>group              | T | F  | 104.2 | 732.2  |        |
| <b>129978</b> | X85815 | Tanytarsus glabrescens<br>group sp 1         | T | F  | 97.7  | 425.2  | 439.9  |
| <b>129978</b> | X85818 | Tanytarsus glabrescens<br>group sp 4         | T | F  | 72.3  | 331.8  | 368.4  |

|               |        |                                    |   |    |       |        |        |
|---------------|--------|------------------------------------|---|----|-------|--------|--------|
| <b>129978</b> | X85821 | Tanytarsus glabrescens group sp 7  | T | F  | 295.9 | 1017.6 | 955.7  |
| <b>129978</b> | X85840 | Tanytarsus sepp                    | T | F  | 232.3 | 1003.7 | 1041.4 |
| <b>131078</b> | X86100 | Chrysops sp                        | D | F  | 233.8 | 1288.1 | 1331.1 |
| <b>131527</b> | X86200 | Tabanus sp                         | D | F  | 117.3 | 661.8  | 564.7  |
| <b>130930</b> | X86401 | Atherix lantha                     | D | MI | 121.2 | 1224.9 | 1262.9 |
| <b>130473</b> | X86900 | Myxosargus sp                      | D | MT | 82.4  |        |        |
| <b>130573</b> | X87190 | Odontomyia (Catatasina) sp         | D | MT | 66.7  | 87     |        |
| <b>130573</b> | X87250 | Odontomyia (Odontomyiina) sp       | D | MT | 66.7  |        |        |
| <b>130627</b> | X87400 | Stratiomys sp                      | D | MT | 160.4 | 1109   | 1164.6 |
| <b>135830</b> | X87501 | Empididae                          | D | F  | 276.2 | 389.7  | 608.7  |
| <b>136352</b> | X87510 | Neoplasta sp                       | D | MI | 70.5  | 169.1  |        |
| <b>136327</b> | X87540 | Hemerodromia sp                    | D | F  | 213.7 | 1139.8 | 1151.8 |
| <b>136824</b> | X87601 | Dolichopodidae                     | D | MT | 108.8 | 89.9   |        |
| <b>144653</b> | X89001 | Sciomyzidae                        | D | MT | 74.6  | 1135.7 | 1238.7 |
| <b>146893</b> | X89501 | Ephydriidae                        | D | F  | 129.4 | 199.6  | 253.9  |
| <b>150730</b> | X89700 | Limnophora sp                      | D | F  | 116.2 | 112.5  |        |
| <b>150806</b> | X89704 | Lispoides aequifrons               | D | F  | 223.9 | 404    |        |
| <b>150733</b> | X89716 | Limnophora discreta                | D | MT | 133.5 | 305.3  |        |
| <b>70312</b>  | X92516 | Campeloma decisum                  | N | F  | 106.9 | 223.1  |        |
| <b>70331</b>  | X92613 | Cipangopaludina chinensis malleata | N | MT | 101   | 72     |        |
| <b>70332</b>  | X92615 | Cipangopaludina japonica           | N | MT | 173.2 | 319.6  |        |
| <b>70493</b>  | X93200 | Hydrobiidae                        | N | F  | 198.5 | 389.1  | 372.7  |
| <b>71654</b>  | X93900 | Elimia sp                          | N | MI | 305   | 653    | 701.5  |
| <b>76497</b>  | X94400 | Fossaria sp                        | N | MT | 194.9 | 930.9  | 871.1  |
| <b>76529</b>  | X94603 | Pseudosuccinea columella           | N | MT | 68.1  | 166.6  |        |
| <b>76534</b>  | X94800 | Stagnicola sp                      | N | T  | 90.7  | 90.5   |        |
| <b>76698</b>  | X95100 | Physella sp                        | N | T  | 306.4 | 1287.9 | 1322   |
| <b>76592</b>  | X95900 | Gyraulus sp                        | N | MT | 212.8 | 58.9   |        |
| <b>76595</b>  | X95907 | Gyraulus (Torquis) parvus          | N | MT | 166.1 | 289    |        |
| <b>76601</b>  | X96002 | Helisoma anceps anceps             | N | F  | 205.8 | 596.4  | 533.9  |
| <b>205210</b> | X96120 | Menetus (Micromenetus) dilatatus   | N | MT | 161.6 | 288.3  | 411.4  |
| <b>76654</b>  | X96200 | Planorbella sp                     | N | T  | 90.6  | 88.7   |        |
| <b>76667</b>  | X96264 | Planorbella (Pierosoma) pilsbryi   | N | T  | 210   | 462.9  | 553.1  |
| <b>76671</b>  | X96280 | Planorbella (Pierosoma) trivolis   | N | MT | 126.5 | 158.4  |        |



|               |        |                            |   |    |       |        |        |
|---------------|--------|----------------------------|---|----|-------|--------|--------|
| <b>76569</b>  | X96900 | Ferrissia sp               | N | F  | 272.9 | 818    | 824.6  |
| <b>76577</b>  | X96930 | Laevapex fuscus            | N | MT | 133.5 | 354.5  |        |
| <b>81387</b>  | X97601 | Corbicula fluminea         | N | F  | 250   | 928    | 963.2  |
| <b>81339</b>  | X97710 | Dreissena polymorpha       | N | F  | 210.1 | 658.9  | 716.1  |
| <b>112738</b> | X98001 | Sphaeriidae                | N | NA | 83.6  | 84.2   |        |
| <b>81400</b>  | X98200 | Pisidium sp                | N | MT | 295.2 | 1071.9 | 1077.7 |
| <b>81391</b>  | X98600 | Sphaerium sp               | N | F  | 307.5 | 891.2  | 928.8  |
| <b>568179</b> | X99100 | Pyganodon grandis          | N | F  | 168.1 | 376.2  | 447.7  |
| <b>568432</b> | X99120 | Utterbackia imbecillis     | N | MI | 93.8  | 367.9  |        |
| <b>80148</b>  | X99160 | Anodontoides ferussacianus | N | F  | 133.8 | 205.9  |        |
| <b>80152</b>  | X99180 | Strophitus undulatus       | N | MI | 104.2 | 200.3  |        |
| <b>79918</b>  | X99200 | Alasmidonta marginata      | N | MI | 80.2  | 73.2   |        |
| <b>80135</b>  | X99240 | Lasmigona complanata       | N | MI | 149.9 | 588.7  | 637.2  |
| <b>80138</b>  | X99260 | Lasmigona compressa        | N | MI | 108.9 | 682.7  |        |
| <b>80139</b>  | X99280 | Lasmigona costata          | N | MI | 176.3 | 169.9  |        |
| <b>80293</b>  | X99320 | Tritogonia verrucosa       | N | MI | 118   | 413.4  | 448.6  |
| <b>80063</b>  | X99380 | Cyclonaias pustulosa       | N | MI | 111.6 | 329.8  |        |
| <b>80060</b>  | X99400 | Quadrula quadrula          | N | MI | 117.3 | 165.3  | 158    |
| <b>80036</b>  | X99420 | Amblema plicata            | N | MI | 58.4  | 234.7  | 306.1  |
| <b>80041</b>  | X99440 | Fusconaia flava            | N | MI | 161.9 | 382.3  | 429.5  |
| <b>79953</b>  | X99540 | Eurynia dilatata           | N | MI | 65    | 112.8  |        |
| <b>80158</b>  | X99560 | Ptychobranhus fasciolaris  | N | MI | 58.4  | 113.9  |        |
| <b>80193</b>  | X99600 | Actinonaias ligamentina    | N | MI | 43.5  |        |        |
| <b>80167</b>  | X99660 | Truncilla truncata         | N | MI | 132   | 171    |        |
| <b>80182</b>  | X99680 | Leptodea fragilis          | N | MI | 121.9 | 282    | 266    |
| <b>80282</b>  | X99700 | Potamilus alatus           | N | MI | 133.1 | 163    |        |
| <b>80364</b>  | X99740 | Toxolasma parvum           | N | F  | 119.3 | 78.9   |        |
| <b>80202</b>  | X99820 | Villosa iris               | N | MI | 52.3  |        |        |
| <b>80028</b>  | X99860 | Lampsilis siliquoidea      | N | MI | 169   | 459.1  | 604    |
| <b>80016</b>  | X99880 | Lampsilis cardium          | N | MI | 93.3  | 140.8  | 147.9  |

## Headwater Summary Macroinvertebrate Index Based on Presence/Absence Data

Because artificial substrates are rarely employed at drainage areas less than 20 mi<sup>2</sup>, most macroinvertebrate condition assessments are narrative ratings based on qualitative (i.e., presence/absence) samples. Also, because the existing multimetric index is based on a population of reference sites with drainage areas mostly greater than 3 mi<sup>2</sup>, expectations for assemblage metrics are ambiguous for very small headwaters. Although the narrative ratings are reliable indicators of condition, categorical ratings lack the advantages inherent in a continuously scaled index. Continuous indexes are more amenable to linear statistics (e.g., correlations against stressors), and provide a finer degree of context for where condition is positioned along a stressor gradient.

A summary numeric index based on qualitative data was constructed by assembling candidate metrics based on either class counts (e.g., the number of taxa classed as mayflies), or as percentages of total taxa found at a given site (e.g., the number of mayfly taxa/total taxa x 100). The various aggregations were as follows:

Table S1. Possible metrics based on qualitative data.

| Metric                    | Counts | Percents  |
|---------------------------|--------|-----------|
| Total Taxa                | TOTL   |           |
| EPT taxa                  | EPT    | PCTEPT    |
| Predators                 | PREDS  | PCPRED    |
| Tolerant (VT, MT, T)      | TOLS   | PCTOL     |
| Non-insect taxa           | NINS   | PCTNINS   |
| Shredders                 | SHRED  | PCTSHRED  |
| Scrapers                  | SCRAPE | PCTSCRAPE |
| Gatherers                 | GATH   | PCTGATH   |
| Filterers                 | FILT   | PCTFILT   |
| Parasites                 | PARA   | PCTPARA   |
| Piercers                  | PIERC  | PCTPIERC  |
| Facultative Taxa          | FACULT | PCTFAC    |
| Sensitive Taxa (MI, I)    | SENS   | PCTSENS   |
| Intolerant Taxa (I)       | INTOL  | PCTINTOL  |
| Mayflies                  | MAY    | PCTMAY    |
| Dipterans                 | DIPT   | PCTDIPT   |
| Tanytarsini midges        | TANY   | PCTTANY   |
| Caddiflies                | CAD    | PCTCAD    |
| Other Taxa                | OTHR   | PCTOTHR   |
| Stoneflies                | STONE  | PCTSTONE  |
| EPT excluding facultative | EPTXF  |           |
| Coldwater indicators      | COLD   | PCTCOLD   |

Clearly, one might suspect that many of these metrics are highly correlated, so a principal component analysis (PCA) was run to examine how the various metrics ran together and which carried the most information. Results from the PCA and inspection of a correlation matrix suggested that, as one might expect, most of the information in the data set was carried by the covariance between the percentage of taxa classed as sensitive and those classed as tolerant.

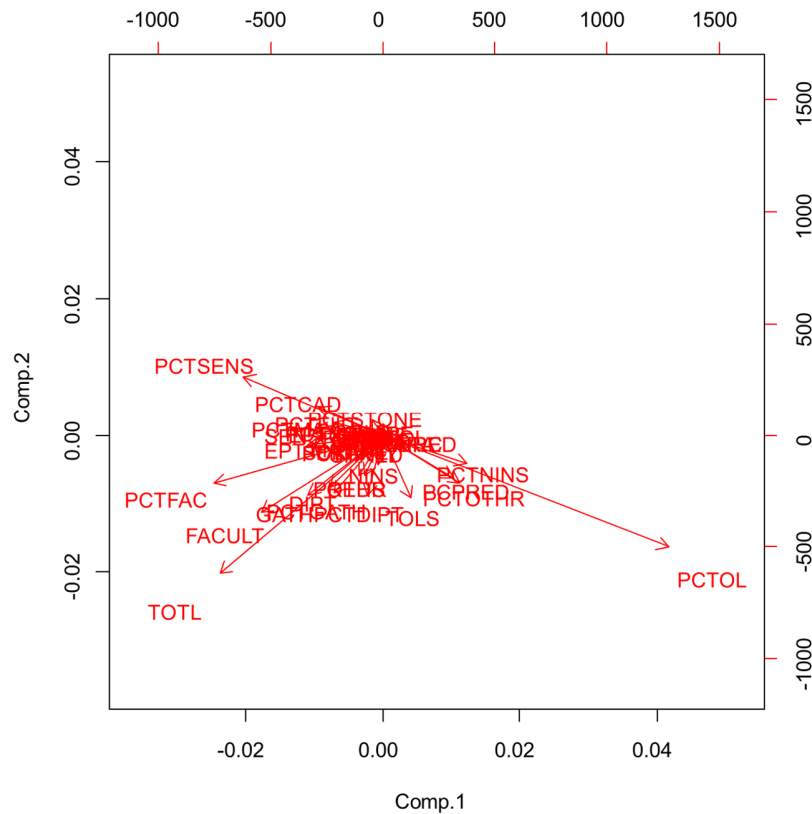

Figure S1. A PCA biplot based on covariance.

The metrics were also examined by correlations with water quality or habitat variables. These correlation matrices showed that the percentage of taxa classed as sensitive typically had the strongest negative correlation against stressors, whereas the percentage of taxa classed as non-insects typically had the highest positive correlation with stressors, and the percentage of taxa classed as tolerant also showed strong positive correlations with stressors. The percentage of taxa classed as mayflies showed the strongest negative association with TDS, and the number of caddisfly taxa appeared most sensitive to dissolved oxygen and pH. So three “positive” metrics chosen were the percent sensitive taxa, percent mayfly taxa, and the number of caddisfly taxa. The percentages of taxa classed as tolerant or non-insect were chosen as two “negative” metrics. The third “negative” metric chosen was the percent of taxa classed as predators. This metric was chosen because although it did not correlate strongly with stressors, it did respond in a consistent direction, was negatively correlated with the three “positive” metrics, and like caddisflies, tended to respond to pH and dissolved oxygen (though negatively). Neither facultative taxa or percent facultative taxa were included as a “negative” metric because neither correlated in a consistent direction with stressor variables. The correlations between candidate metrics are shown in Table 2.

Table S2. Spearman correlations between qualitative metrics, and between metric scores.

|         | PCTSENS    | PCTMAY     | CAD        | PCTNINS    | PCTOL     | PCPRED    |
|---------|------------|------------|------------|------------|-----------|-----------|
| PCTSENS | 1.0000000  |            |            |            |           |           |
| PCTMAY  | 0.6203664  | 1.0000000  |            |            |           |           |
| CAD     | 0.7666029  | 0.4870526  | 1.0000000  |            |           |           |
| PCTNINS | -0.5393989 | -0.3537628 | -0.4199393 | 1.0000000  |           |           |
| PCTOL   | -0.7606372 | -0.5426041 | -0.6568298 | 0.58919647 | 1.0000000 |           |
| PCPRED  | -0.2843811 | -0.2655521 | -0.3213713 | 0.03706272 | 0.4144577 | 1.0000000 |

  

|        | SENSC  | MAYSC  | CADSC  | NINSC  | TOLSC  | PREDSC |
|--------|--------|--------|--------|--------|--------|--------|
| SENSC  | 1      |        |        |        |        |        |
| MAYSC  | 0.6015 | 1      |        |        |        |        |
| CADSC  | 0.4882 | 0.3460 | 1      |        |        |        |
| NINSC  | 0.6399 | 0.4792 | 0.3388 | 1      |        |        |
| TOLSC  | 0.8045 | 0.6050 | 0.4995 | 0.6247 | 1      |        |
| PREDSC | 0.3831 | 0.3583 | 0.3074 | 0.4350 | 0.1262 | 1      |

Reference expectations were set by plotting metric values from reference sites against drainage area, and using quantile regression to draw lines at the 0.05, 0.225, 0.50, 0.725 and 0.95 quantiles. Because few streams with drainage areas less than  $\sim 3 \text{ mi}^2$  are represented by reference sites, expectations for smaller drainage areas were set at the y-intercept for each quantile at  $3.16 \text{ mi}^2$  (i.e.,  $10^{0.5}$ ). The rationale for this was given by inspecting the behavior of quantile lines drawn at the 50<sup>th</sup> and 90<sup>th</sup> percentiles from all sites less than  $3.16 \text{ mi}^2$ , wherein the relationships with drainage area tended to be flat or ambiguous (Figure S2). Correlations between resulting metric scores are shown in Table 2.

Metric scores were assigned based on quantile boundaries as follows:

| Quantile Region | Score* |
|-----------------|--------|
| $\leq 5$        | 0      |
| $>5 \leq 22.5$  | 2      |
| $>22.5 \leq 50$ | 4      |
| $>50 \leq 72.5$ | 6      |
| $>72.5 \leq 95$ | 8      |
| $>95$           | 10     |

\*Note that the scoring order here reflects “positive” metrics.

The performance of the final, summed index (the HWMI, for headwater macroinvertebrate index) was gaged by inspecting plots and correlations of index scores against common stressors (Table 3), and the variance of scores within pre-assigned narrative assessments (Figure S3). In general, the HWMI showed similar sensitivities to stressors (as gaged by correlation coefficients) when compared to other common biological measures used in headwaters (e.g., EPT richness). When binned by narrative assessments, the central tendency of HWMI scores decreased successively across the grades, and were significantly different from each other in all categories. A similar pattern was also observed when the percent of taxa classed as sensitive were binned by narrative ranges (Figure S3).

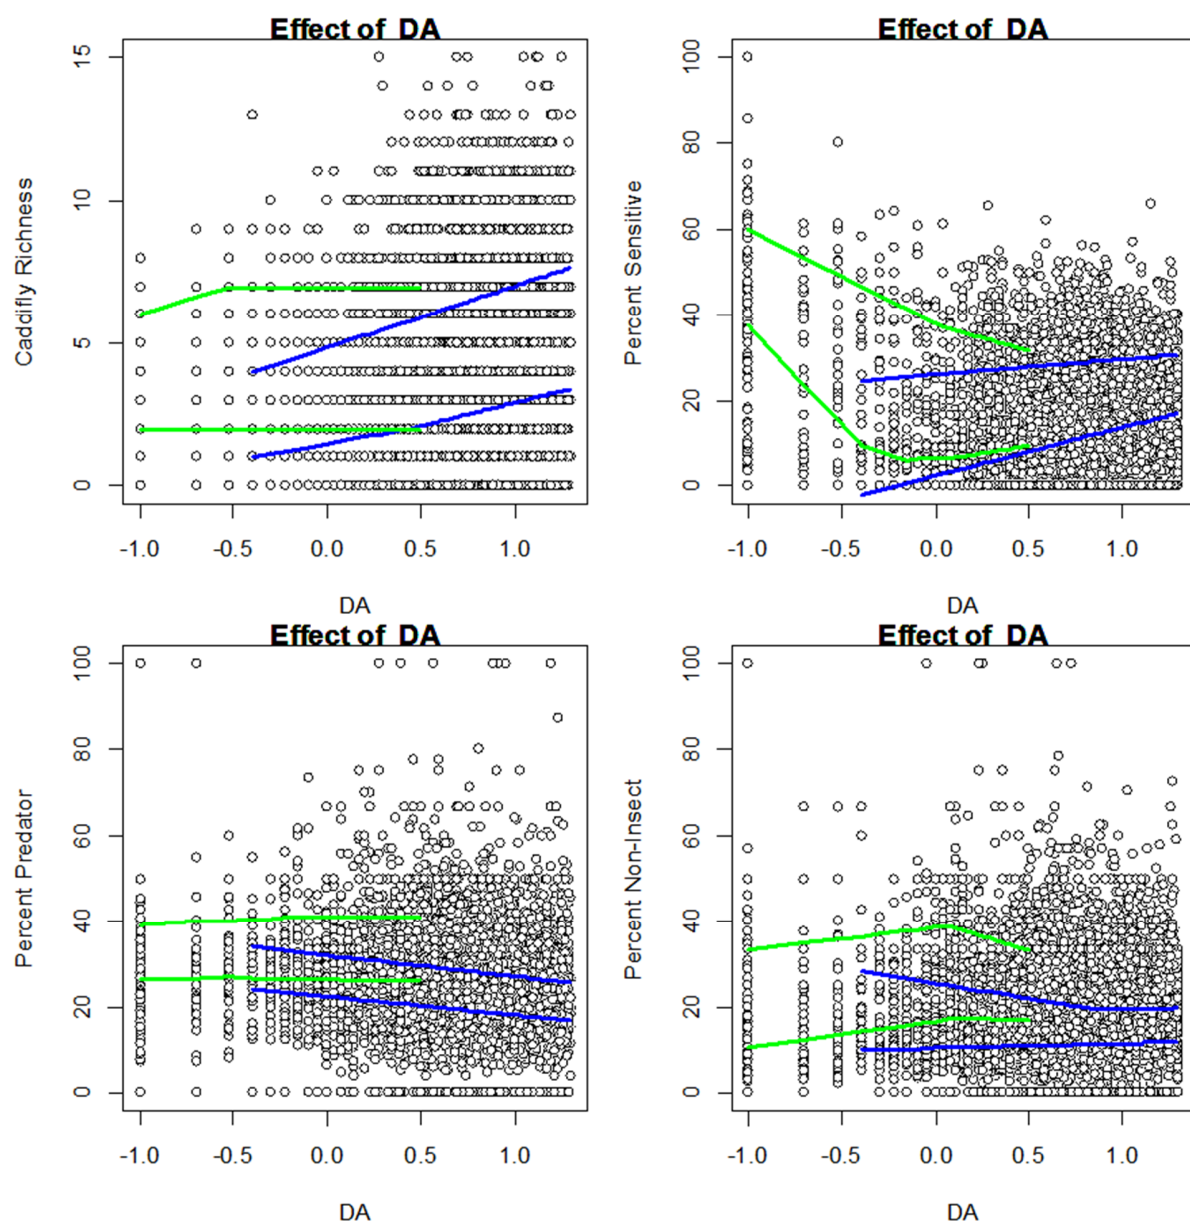

Figure S2. Quantile regression lines at the 25<sup>th</sup> and 75<sup>th</sup> percentiles for select metrics at reference sites (blue lines), and at the 50<sup>th</sup> and 90<sup>th</sup> percentile for all sites with drainage areas < 3.16mi<sup>2</sup> (green lines).

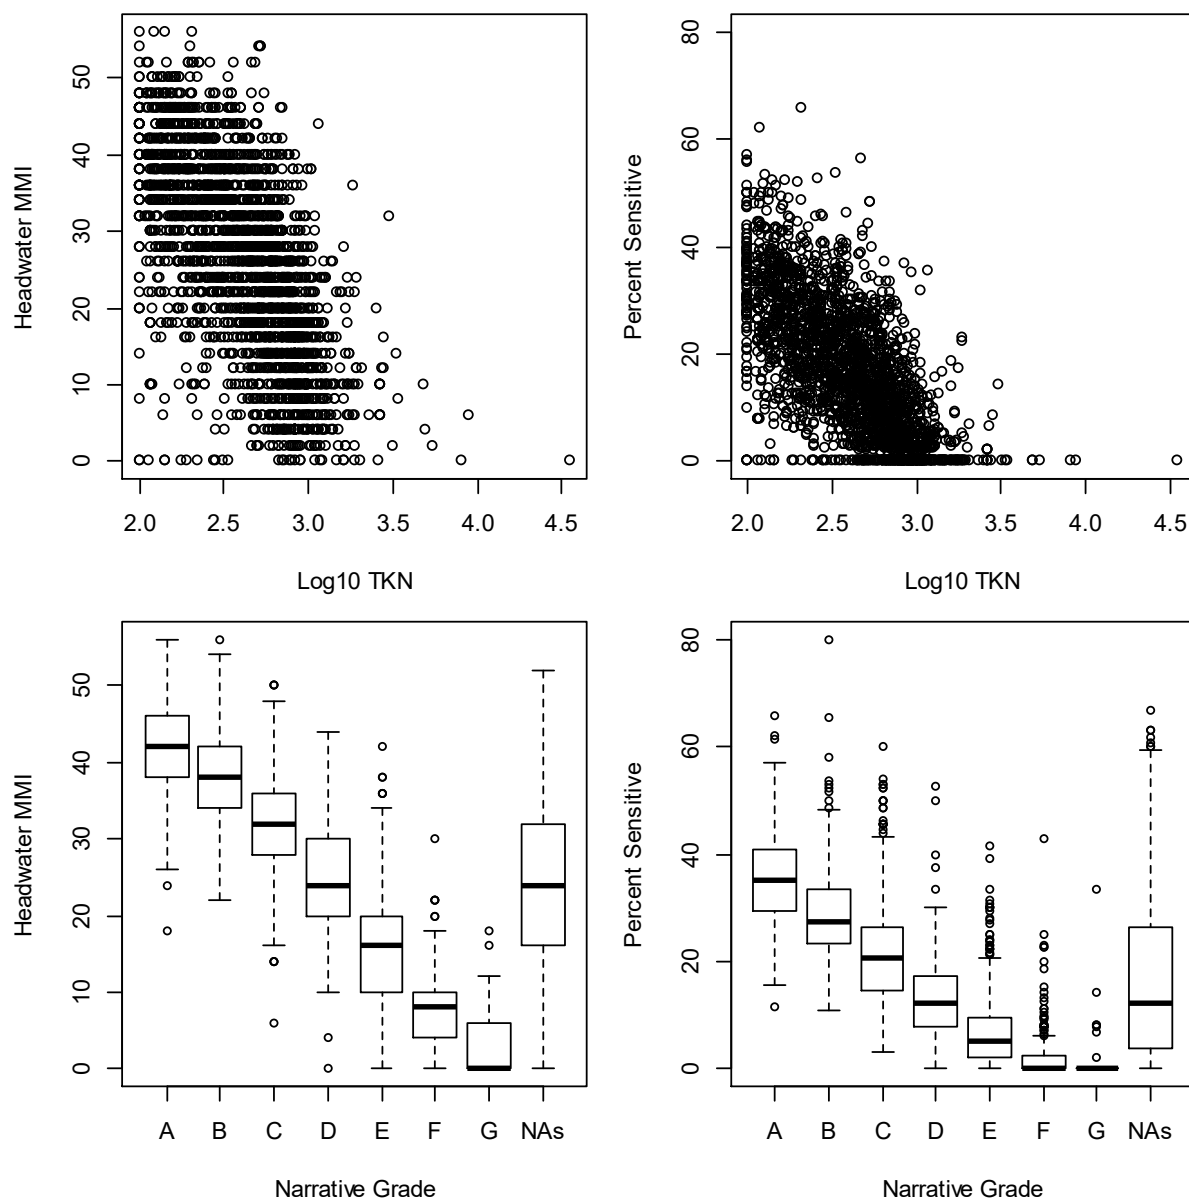

Figure S3. Plots of the HWMI and percent of taxa classed as sensitive against TKN concentrations, and boxplots of the HWMI and percent sensitive taxa binned by narrative assessment grades (i.e., A = Exceptional, etc.).

Table 3. Correlations of biological metrics or summary index scores against common water quality indicators. HWMI is an abbreviation for the headwater macroinvertebrate index.

|         | Arsenic | Chloride | COD     | D.O.   | NH3     | TKN     | TP      | QHEI   |
|---------|---------|----------|---------|--------|---------|---------|---------|--------|
| HWMI    | -0.5312 | -0.4197  | -0.4679 | 0.2737 | -0.5086 | -0.6373 | -0.5266 | 0.5099 |
| EPT     | -0.4414 | -0.3872  | -0.3979 | 0.2594 | -0.4612 | -0.5555 | -0.4790 | 0.4538 |
| PCTSENS | -0.5344 | -0.4993  | -0.4540 | 0.2400 | -0.4708 | -0.6817 | -0.5889 | 0.5017 |
| PICI    | -0.4296 | -0.3113  | -0.4273 | 0.2707 | -0.5111 | -0.5223 | -0.4285 | 0.4777 |
| ICI     | -0.3108 | -0.2489  | -0.1531 | 0.2760 | -0.4602 | -0.4482 | -0.3407 | 0.1891 |

Lastly, in terms of “attainment” status, when waters classed as WWH are coded to whether the HWMI is greater than or less than the 25<sup>th</sup> percentile from the respective ecoregional reference population scores, the percentages of sites falling below the cutoff are as follows:

|                                                                | HELP | IP   | EOLP | WAP  | ECBP |
|----------------------------------------------------------------|------|------|------|------|------|
| Percent of WWH sites with HWMI<25 <sup>th</sup> % of reference | 41.4 | 36.8 | 31.4 | 30   | 64.6 |
| Percent of WWH sites with Narratives < Good                    | 62.7 | 57.7 | 49.8 | 59.9 | 52.7 |

The distributions of HWMI scores by reference site and ecoregion are shown in Figure S4. Compared to the ICI, the 25<sup>th</sup> percentiles from reference sites show more variability between ecoregions. Relative to the condition status based on narrative ratings, status based on the HWMI results in a smaller proportion of waters being classed as impaired in all ecoregions except the ECBP. The reversal in the ECBP may be due to the slight tendency to rate ECBP sites higher with lower numbers of sensitive taxa and higher numbers of tolerant taxa relative to the IP, EOLP and WAP (Figure S5). The net effect of this can be seen in distributions of HWMI scores plotted by ecoregion and narrative grades (Figure S6). For all regions except the ECBP, most of the HWMI scores within the “Good” bin (i.e., grade C in Figure S6), and many in the “Marginal” bin, were above the respective 25<sup>th</sup> percentile reference scores.

Lastly, the HWMI provided a slight advantage over narrative ratings in terms of specificity to some environmental gradients. For example, TKN concentrations tended to be higher at sites rated impaired by the HWMI compared to those rated “Marginal” or less (Figure S7). The net effect of this can be observed in a receiver-operator curve (Figure S8). For other gradients like TDS, no advantage was apparent (Figure S9).

### Summary

In terms of sensitivity to environmental gradients, the HWMI is similar to EPT or sensitive taxa richness, at least in a correlative sense, but is much more sensitive than the existing ICI, and appears to provide some advantage over narrative ratings. Essentially the HWMI represents the counter gradient of sensitive and tolerant taxa. Inclusion of other metrics likely makes a marginal contribution to overall sensitivity to the environmental gradient, but adds redundancy to the final index.

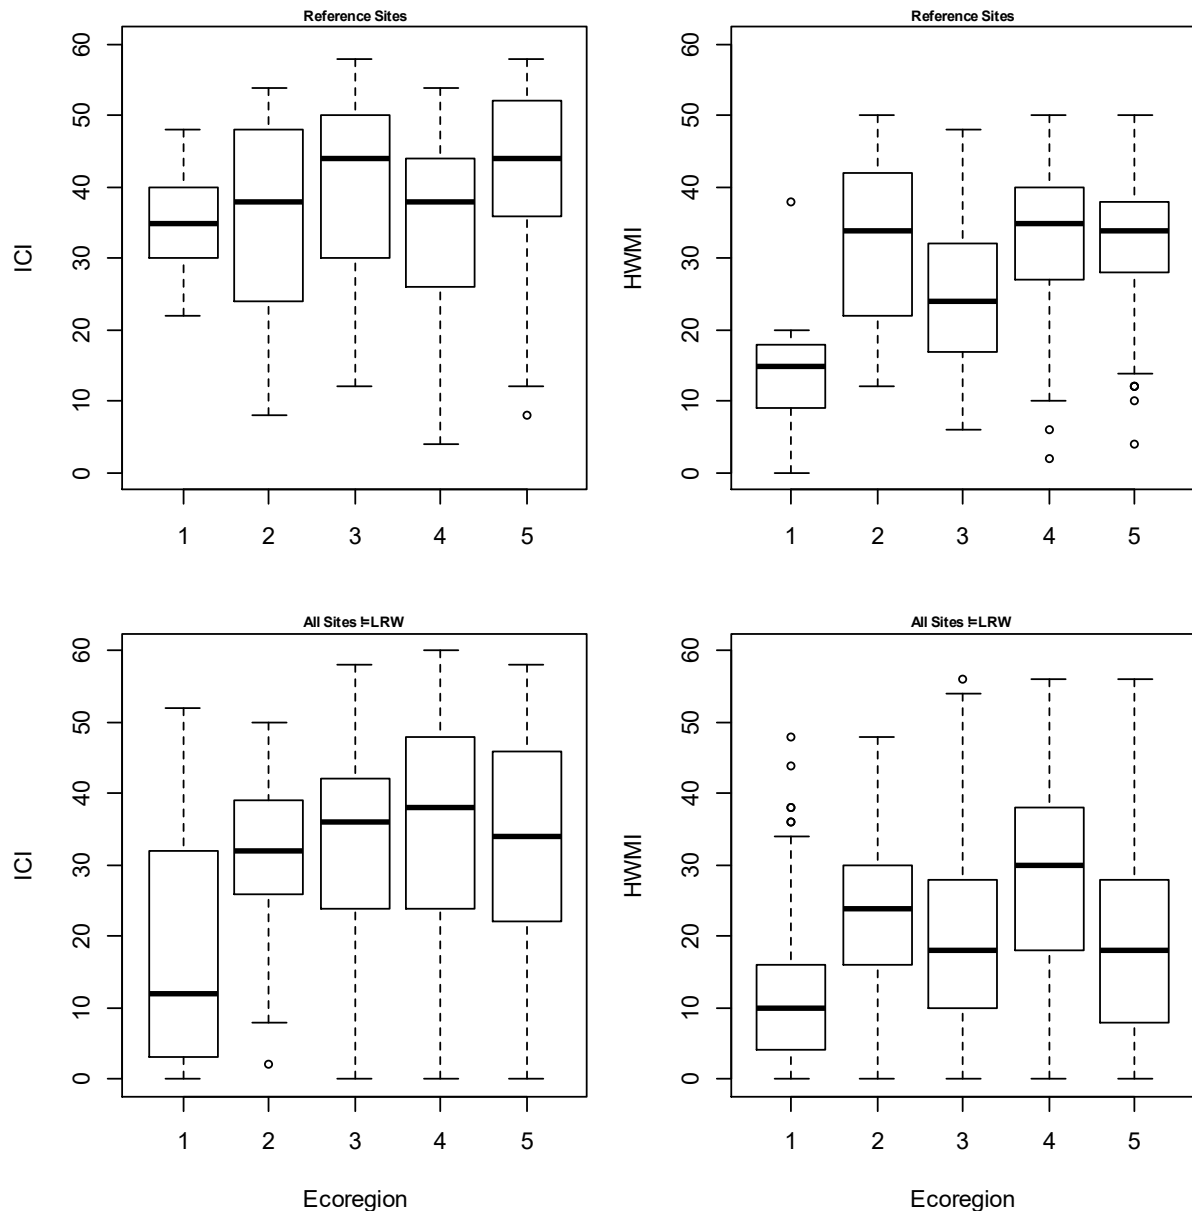

Figure S4. Distributions of ICI and HWMI scores by ecoregion and stratified by reference sites (top row) or survey sites (excluding LRW sites).



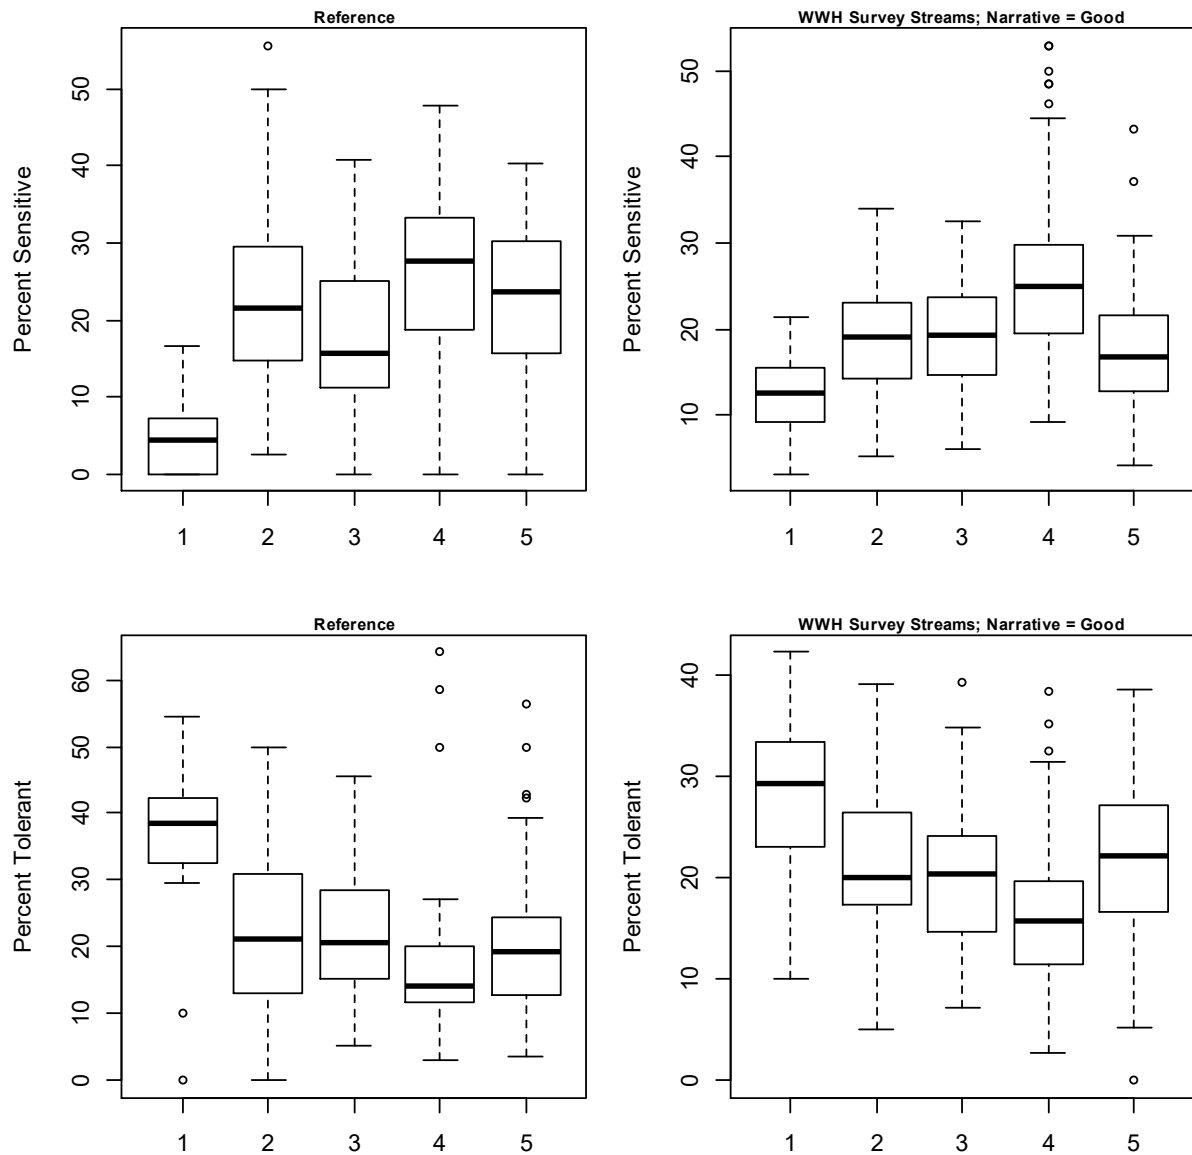

Figure S5. Distributions of percent sensitive (top row) and percent tolerant taxa (bottom row) by ecoregion for reference sites (left column) and WWH streams with a narrative rating of “Good” (right column).

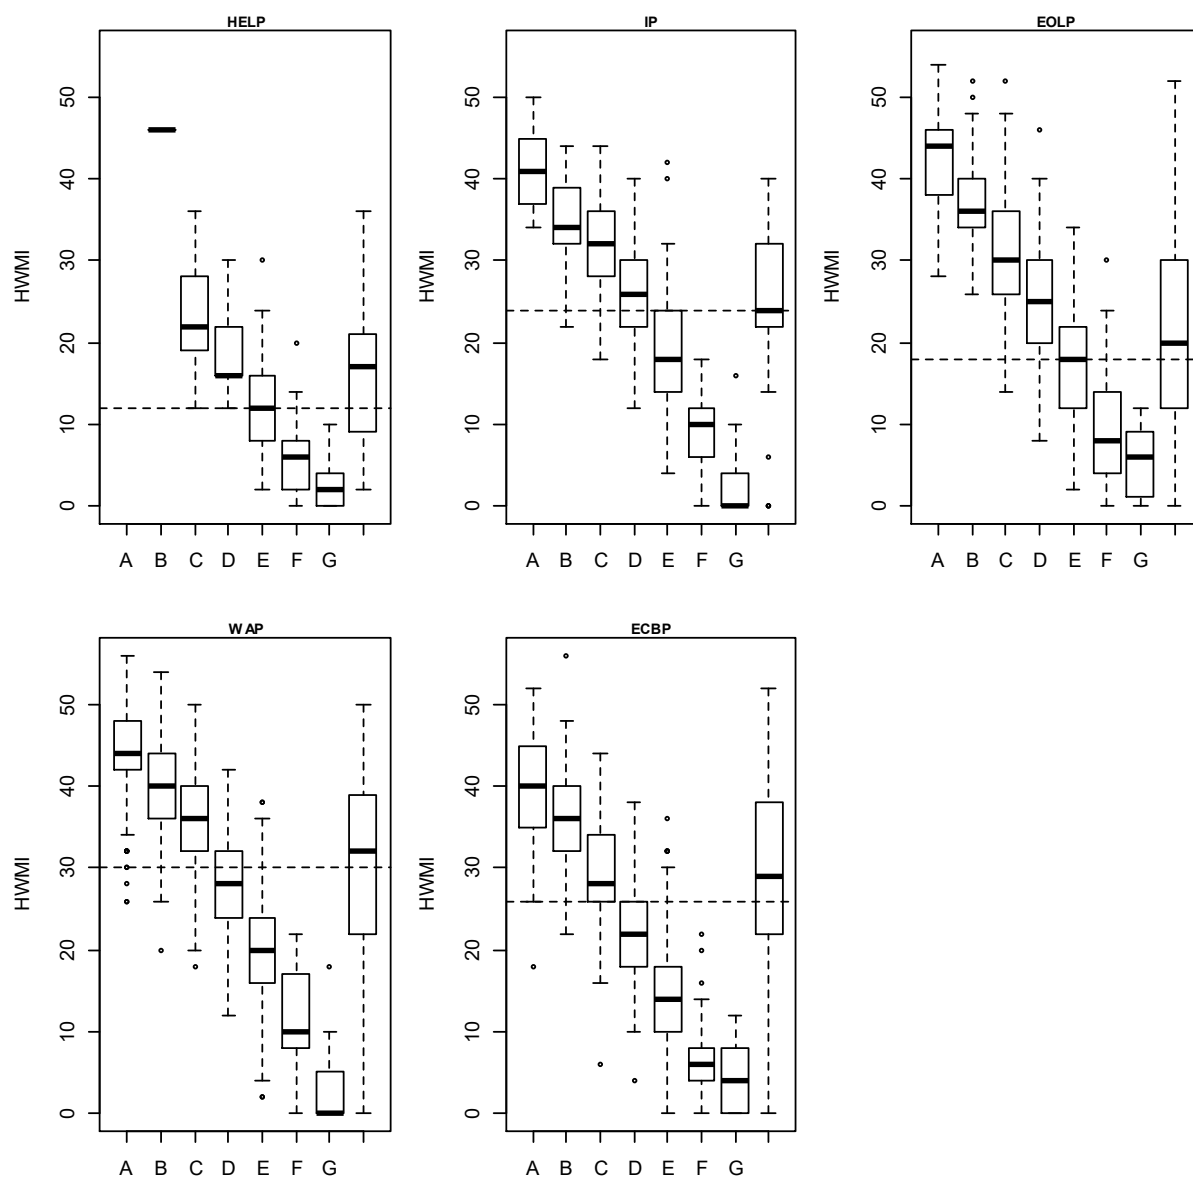

Figure S6. Distributions of HWMI scores for sites with WWH designations plotted by ecoregion and narrative grade. The dashed line in each plot represents the 25<sup>th</sup> percentile from reference sites. Note that y-axis scales vary by ecoregion.

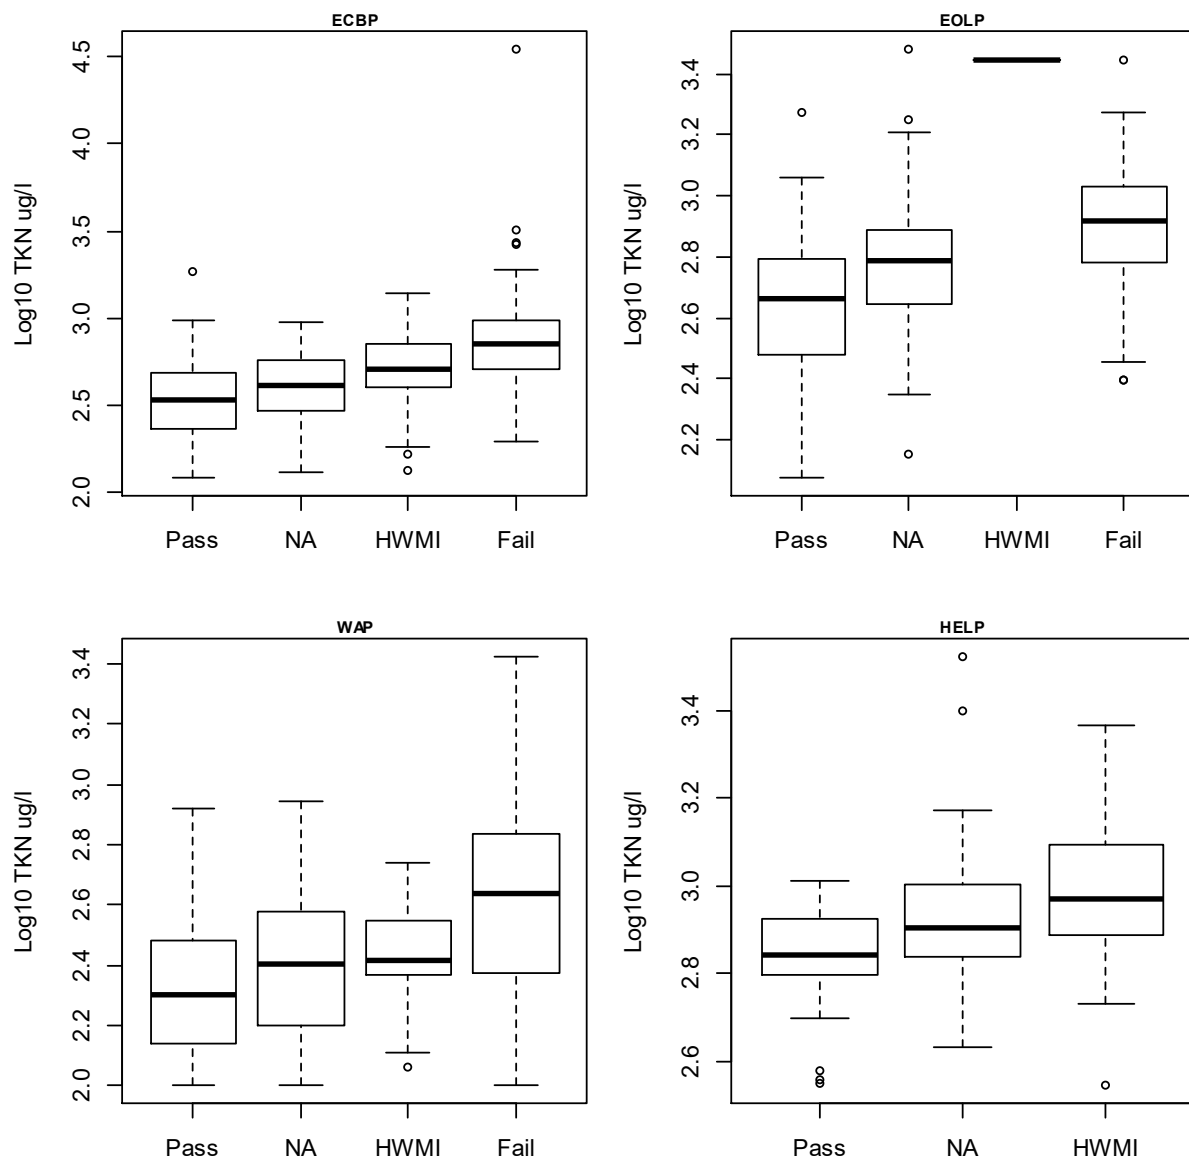

Figure S7. Distributions of TKN concentrations binned by whether condition was deemed passing by both the HWMI and narrative assessments (Pass), failing by narrative assessment only (NA), failing by the HWMI only (HWMI), or failing according to both (Fail).

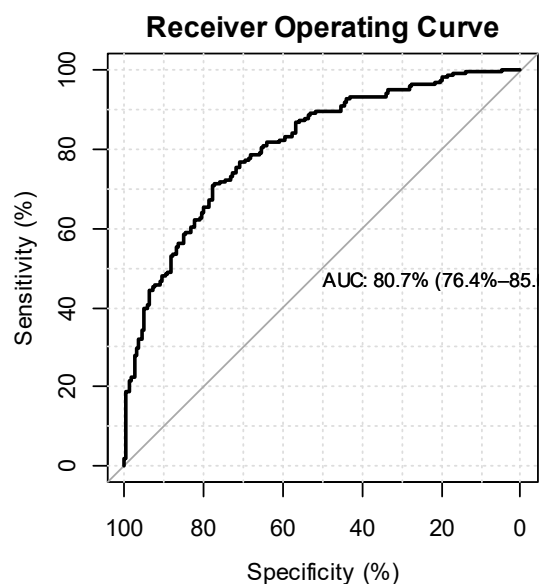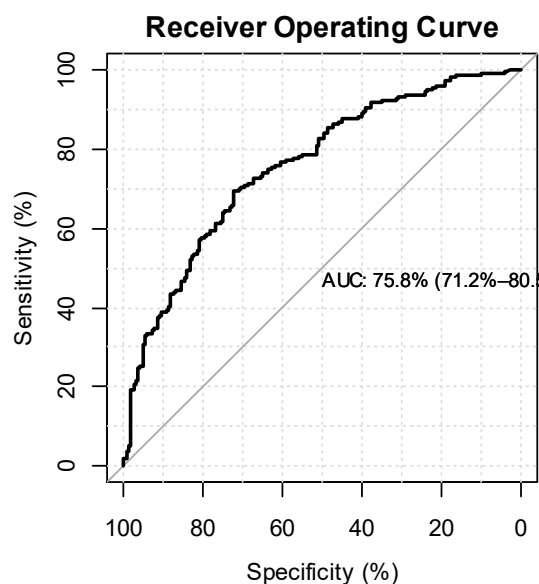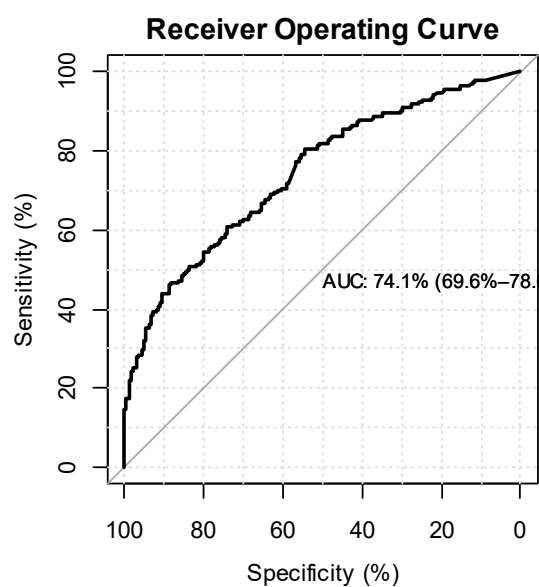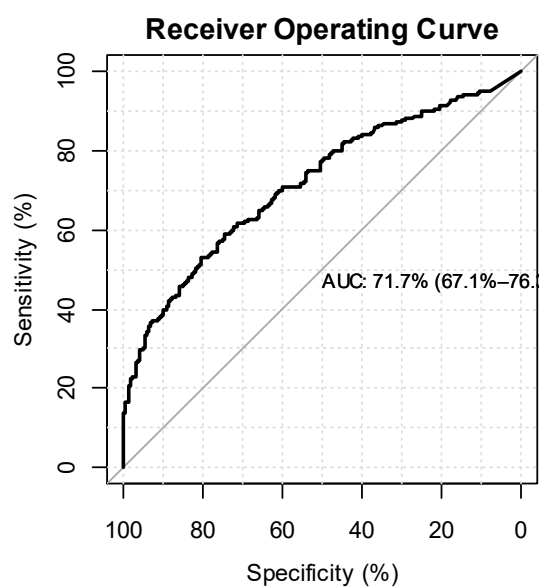

Figure S8. ROC plots for TKN concentrations for the ECBP (top row) and the WAP (bottom row). The left-hand panels are based on pass/fail as judged by the HWMI; the right-hand panels are pass/fail as judged by narrative ratings.

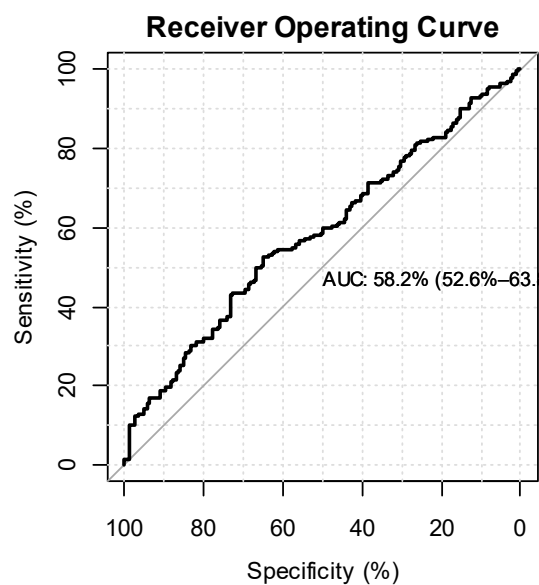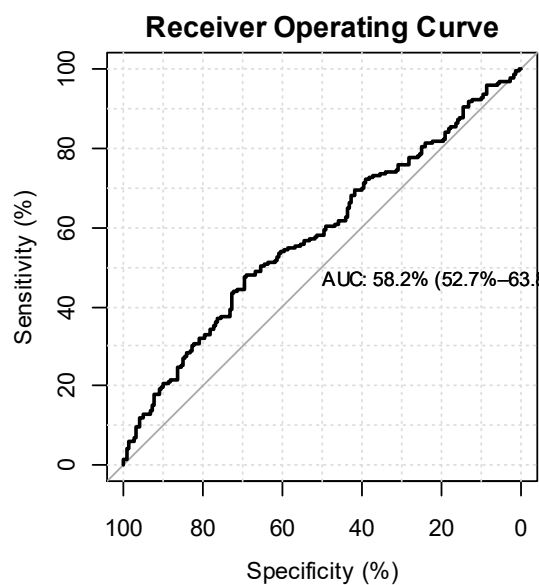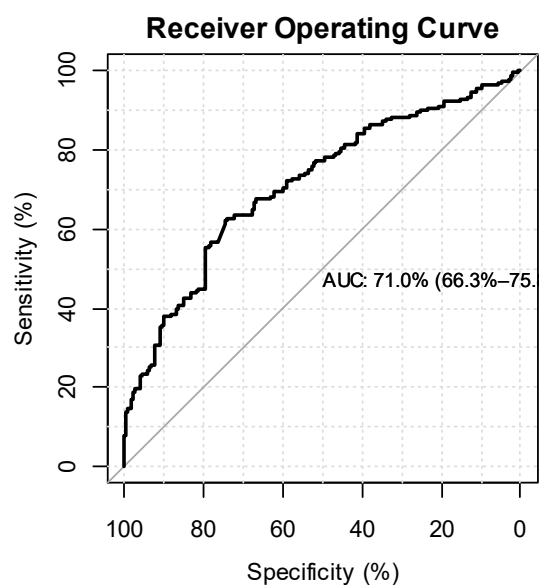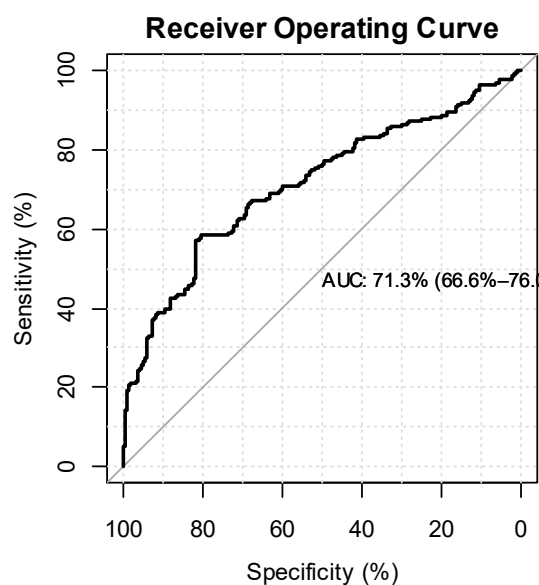

Figure S9. ROC plots for TDS concentrations for the ECBP (top row) and the WAP (bottom row). The left-hand panels are based on pass/fail as judged by the HWMI; the right-hand panels are pass/fail as judged by narrative ratings.

Addendum, May 15, 2018: A brief note on the stability of the HWMI when applied to very small headwaters.

The HWMI was developed to provide a summary numeric index for qualitative macroinvertebrate samples based on reference expectations. The original documentation describing the development and performance of the final index did not explicitly discuss performance with respect to drainage area. Quantile regression lines demonstrate that HWMI is neutral with respect to drainage area, indicating that a criterion benchmark for a high-tier aquatic life use derived from the reference sites (i.e., the 75<sup>th</sup> percentile) can be applied across the board, as well as ecoregion-specific benchmarks for lower tiers.

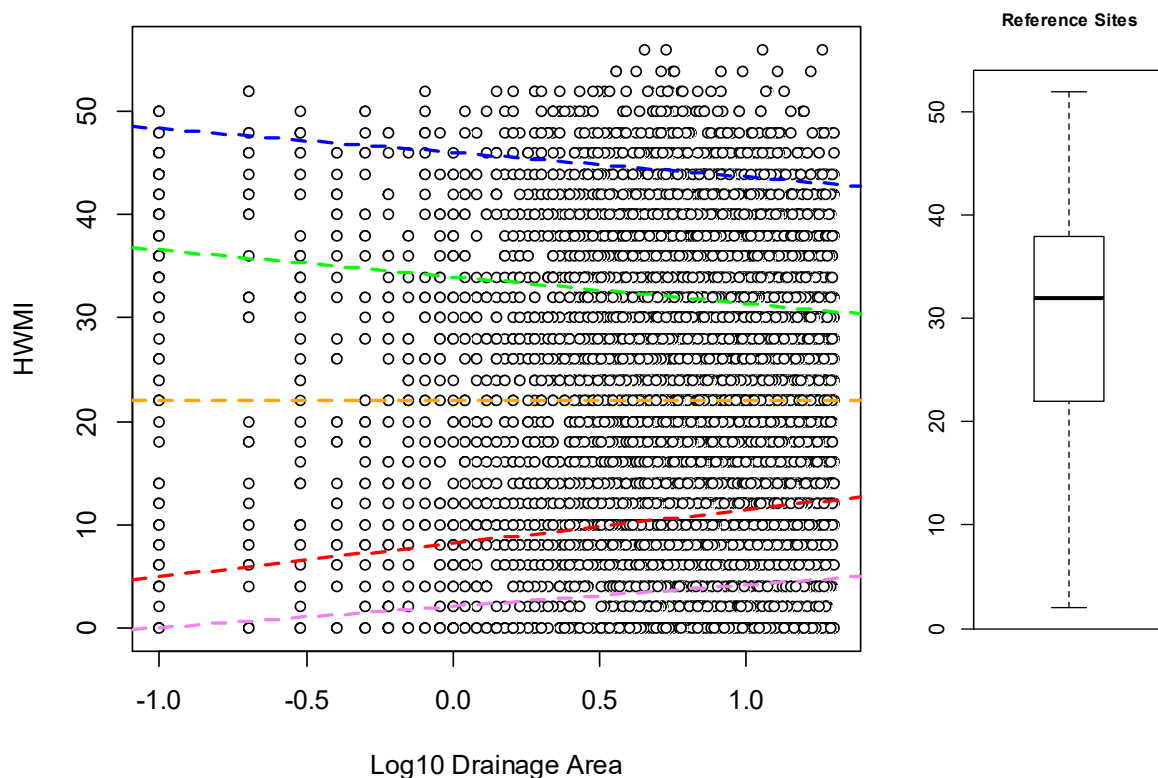

Figure S10. A scatter plot of HWMI scores by drainage area. Lines in the plot are drawn from quantile regression at the 95<sup>th</sup>, 75<sup>th</sup>, 50<sup>th</sup>, 25<sup>th</sup> and 10<sup>th</sup> (violet) percentiles. The box plot shows the distribution of scores from reference sites.

With respect to response to stressor gradients, very little water chemistry exists for sites less than 2.5 mi<sup>2</sup> in drainage area; however, a sufficient number of QHEI scores exist to examine the performance of the HWMI over a gradient of habitat quality. For these very small streams, the HWMI has a tighter correlation with the QHEI than the fish IBI (Figure S11).

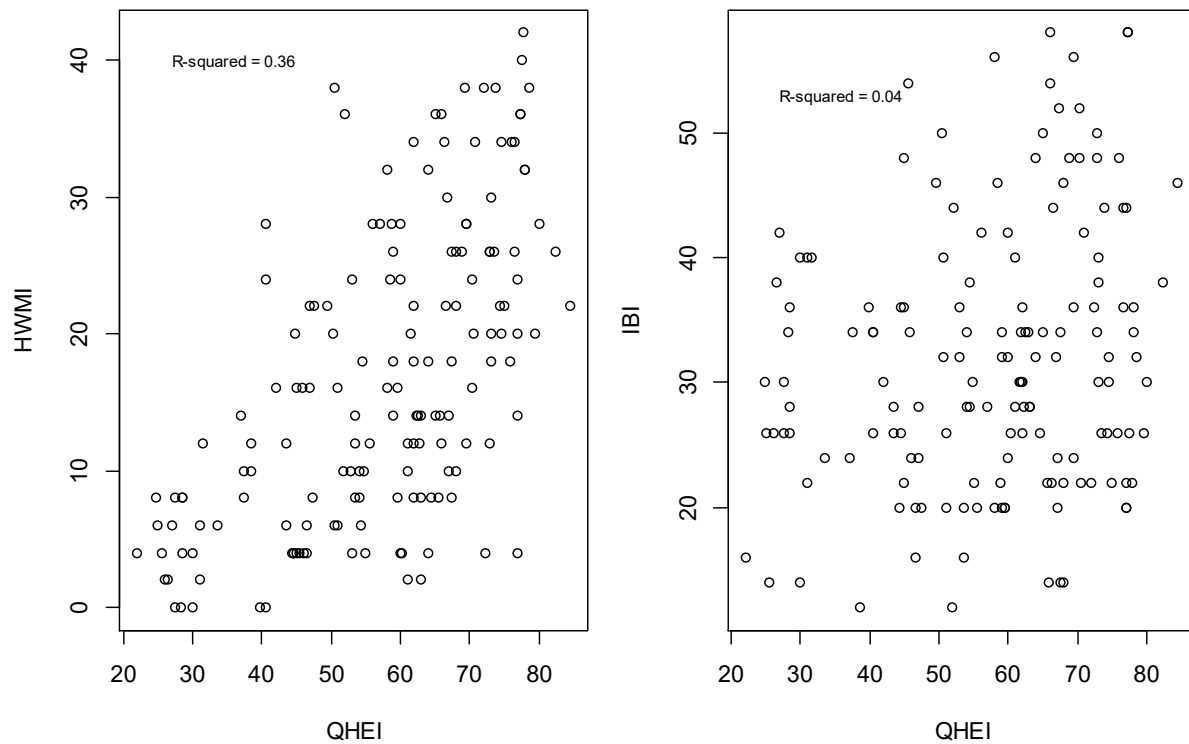

Figure S11. Scatter plots of HWMI and fish IBI scores against the same set of QHEI scores.

Lastly, the HWMI scores binned by narrative grades assigned to samples by the macroinvertebrate biologists show clear separation in terms of interquartile ranges between major grades (i.e., E to G; Figure S12).

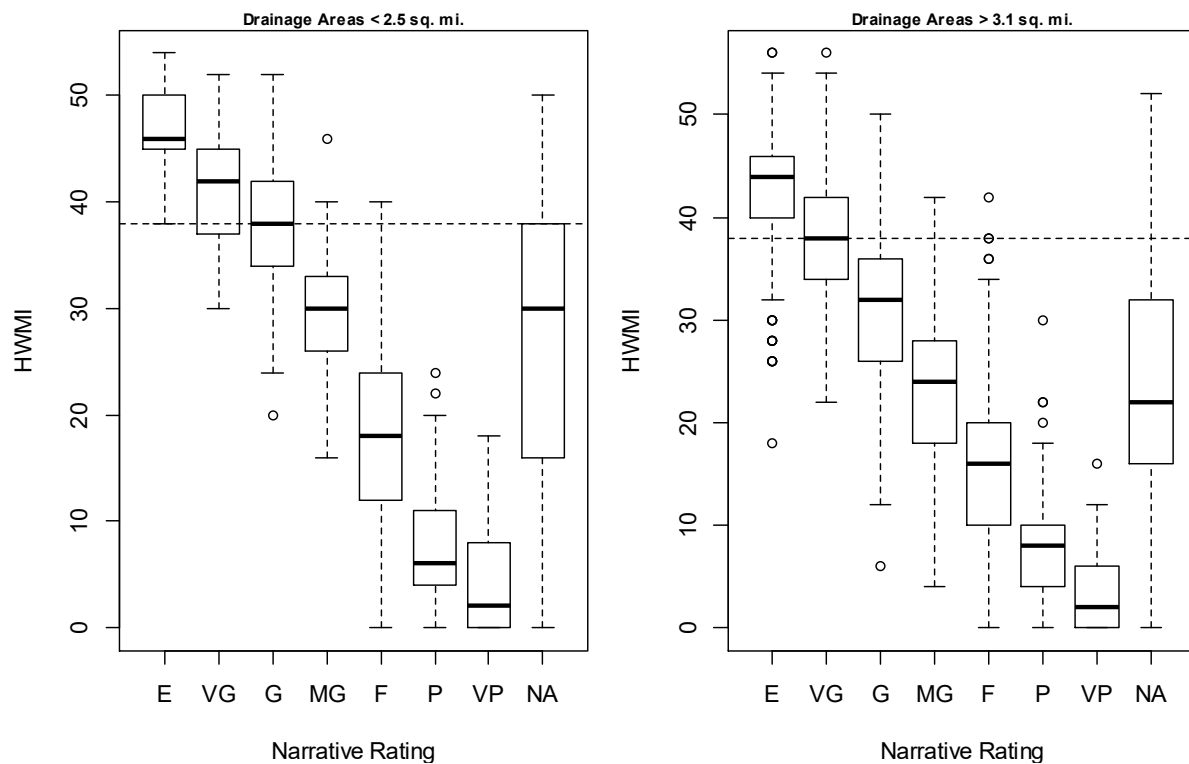

Figure S12. Distributions of HWMI scores by narrative grades assigned to samples by the macroinvertebrate biologists. The left panel is for sites less than 2.5 mi<sup>2</sup>, and the right panel is for sites greater than 3.1 mi<sup>2</sup>. The dashed-horizontal line in each plot represents the 75<sup>th</sup> percentile score from reference sites.



Addendum, June 24, 2021: Scoring cutoffs for the base aquatic life use (i.e., Warmwater Habitat) are identified by the 25<sup>th</sup> percentile from regional reference sites. Because the number of reference sites for headwaters becomes small when stratified by ecoregion, the 25<sup>th</sup> percentiles for the respective ecoregions are compared to 25<sup>th</sup> percentile HWMI scores binned by narrative grades assigned for all headwater sites. The top panel of the accompanying figure shows distributions of HWMI scores for headwater reference sites sampled between 2003 and 2019. The 25<sup>th</sup> percentiles are labeled in each boxplot, and the number of reference sites within an ecoregion is shown along the top margin. The 2003-2019 time-period captures the implementation of agricultural best management practices intended to reduce soil erosion, and thus better captures reference expectations than drawing from the entire period of record (1981-2019). The lower panel shows 25<sup>th</sup> percentiles for MMI scores binned by narrative grades assigned by the macroinvertebrate biologists (n.b., the narratives were assigned without knowledge of the HWMI scores) and stratified by ecoregion. The black squares show the corresponding cutoff suggested by the reference sites. For the HELP, EOLP and ECBP the 25<sup>th</sup> percentiles from the respective reference sites are similar to the 25<sup>th</sup> percentiles from scores with a narrative grade of “Good”. For the IP, the reference cutoff falls within the range of “Good” and “Marginal”, and in the WAP, the reference cutoff is within the range of “Very Good” and “Good”. These results suggests that the 25<sup>th</sup> percentiles from the reference sites are reasonable approximations for a Warmwater Habitat benchmark for use in modeling or statistical analyses.

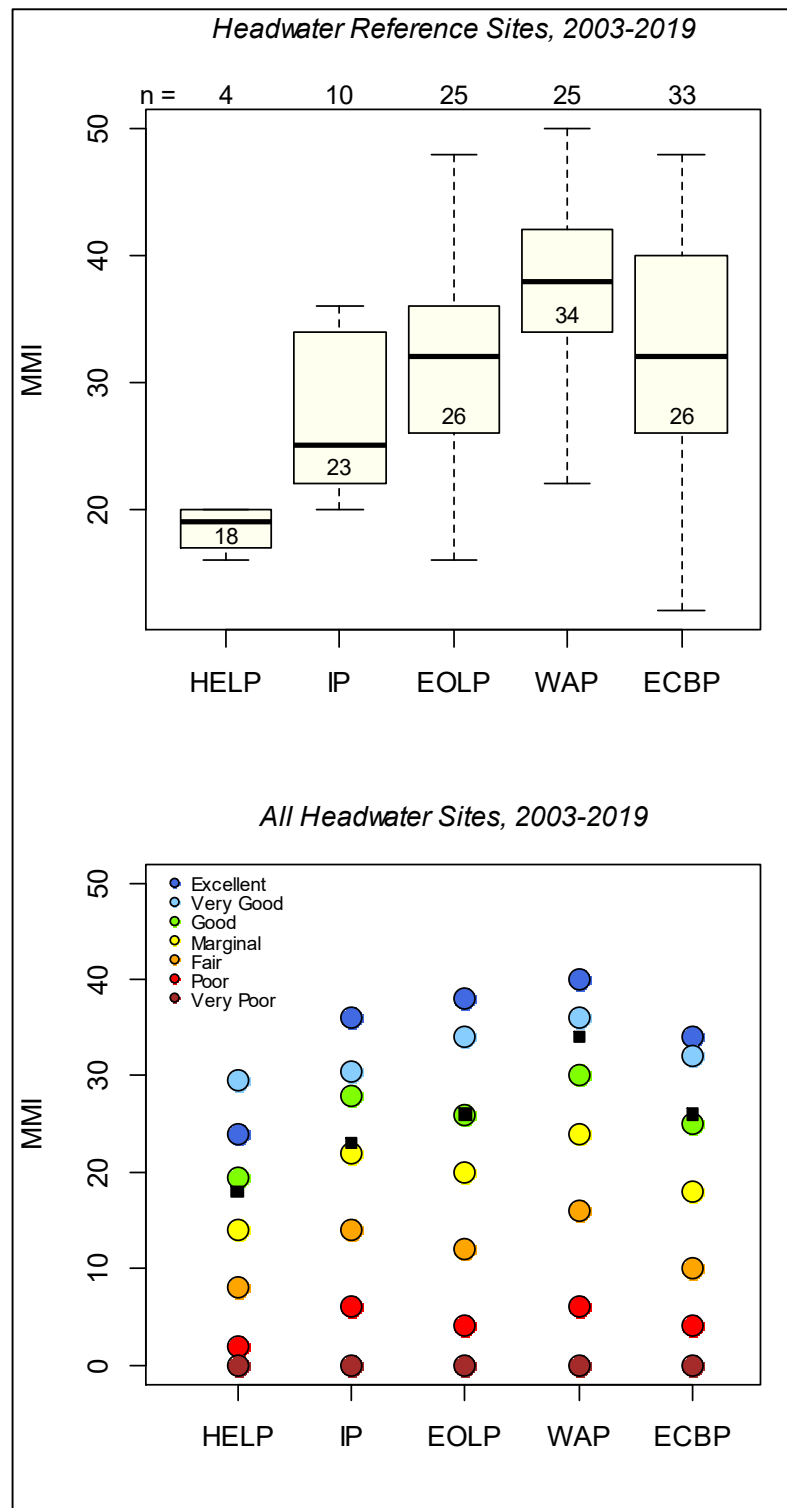

Scoring equations for the HWMI (in SQL syntax). Note that drainage area is log10 of square miles.

#### Percent Sensitive

```
CASE WHEN NVL(TOTL,0)<10 THEN 0
WHEN DA>=0.5 AND NVL(SENS/TOTL*100,0) > 8.520277*DA+30.774369 THEN 10
WHEN DA<0.5 AND NVL(SENS/TOTL*100,0)> 35.0345075 THEN 10
WHEN DA>=0.5 AND NVL(SENS/TOTL*100,0) > 2.748877*DA+26.086957 THEN 8
WHEN DA<0.5 AND NVL(SENS/TOTL*100,0)> 27.4613955 THEN 8
WHEN DA>=0.5 AND NVL(SENS/TOTL*100,0) > 7.291028*DA+14.7796 THEN 6
WHEN DA<0.5 AND NVL(SENS/TOTL*100,0)> 18.425114 THEN 6
WHEN DA>=0.5 AND NVL(SENS/TOTL*100,0) > 13.1130715*DA+-0.1216001 THEN 4
WHEN DA<0.5 AND NVL(SENS/TOTL*100,0)> 6.43493565 THEN 4
WHEN DA>=0.5 AND NVL(SENS/TOTL*100,0) > 6.448487*DA+-1.797539 THEN 2
WHEN DA<0.5 AND NVL(SENS/TOTL*100,0)> 1.4267045 THEN 2
ELSE 0
END SENS,
```

#### Percent Mayfly

```
CASE WHEN NVL(TOTL,0)<10 THEN 0
WHEN DA>=0.5 AND NVL(MAY/TOTL*100,0) > -5.178875*DA+29.166667 THEN 10
WHEN DA<0.5 AND NVL(MAY/TOTL*100,0)> 26.5772295 THEN 10
WHEN DA>=0.5 AND NVL(MAY/TOTL*100,0) > -0.9534321*DA+18.3749356 THEN 8
WHEN DA<0.5 AND NVL(MAY/TOTL*100,0)> 17.89821955 THEN 8
WHEN DA>=0.5 AND NVL(MAY/TOTL*100,0) > 2.740925*DA+11.340337 THEN 6
WHEN DA<0.5 AND NVL(MAY/TOTL*100,0)> 12.7107995 THEN 6
WHEN DA>=0.5 AND NVL(MAY/TOTL*100,0) > 5.663701*DA+4.545455 THEN 4
WHEN DA<0.5 AND NVL(MAY/TOTL*100,0)> 7.3773055 THEN 4
WHEN DA>=0.5 AND NVL(MAY/TOTL*100,0) > 6.910712*DA+-1.216916 THEN 2
WHEN DA<0.5 AND NVL(MAY/TOTL*100,0)> 2.23844 THEN 2
ELSE 0
END MAYSC,
```

#### Number of Caddisfly

```
CASE WHEN NVL(TOTL,0)<10 THEN 0
WHEN DA>=0.5 AND CAD > 2.366589*DA+7.229346 THEN 10
WHEN DA<0.5 AND CAD > 8.4126405 THEN 10
WHEN DA>=0.5 AND CAD > 2.502062*DA+4 THEN 8
WHEN DA<0.5 AND CAD > 5.251031 THEN 8
WHEN DA>=0.5 AND CAD > 2.186379*DA+2.57183 THEN 6
WHEN DA<0.5 AND CAD > 3.6650195 THEN 6
WHEN DA>=0.5 AND CAD > 1.317579*DA+1.431644 THEN 4
WHEN DA<0.5 AND CAD > 2.0904335 THEN 4
WHEN DA>=0.5 AND CAD > 0*DA+1 THEN 2
WHEN DA<0.5 AND CAD > 1 THEN 2
ELSE 0
END CADSC,
```

#### Percent Tolerant Taxa

```
CASE WHEN NVL(TOTL,0)<10 THEN 0
WHEN DA>=0.5 AND NVL(TOLS/TOTL*100,0) > -14.29808*DA+55.03687 THEN 0
WHEN DA<0.5 AND NVL(TOLS/TOTL*100,0)> 47.88783 THEN 0
WHEN DA>=0.5 AND NVL(TOLS/TOTL*100,0) > -11.7609*DA+37.42617 THEN 2
WHEN DA<0.5 AND NVL(TOLS/TOTL*100,0)> 31.54572 THEN 2
WHEN DA>=0.5 AND NVL(TOLS/TOTL*100,0) > -2.629171*DA+21.879586 THEN 4
WHEN DA<0.5 AND NVL(TOLS/TOTL*100,0)> 20.5650005 THEN 4
WHEN DA>=0.5 AND NVL(TOLS/TOTL*100,0) > -3.305626*DA+14.960026 THEN 6
WHEN DA<0.5 AND NVL(TOLS/TOTL*100,0)> 13.307213 THEN 6
WHEN DA>=0.5 AND NVL(TOLS/TOTL*100,0) > 1.649508*DA+4.218659 THEN 8
WHEN DA<0.5 AND NVL(TOLS/TOTL*100,0)> 5.043413 THEN 8
ELSE 10
END TOLSC,
```

#### Percent Non-Insects

```
CASE WHEN NVL(TOTL,0)<10 THEN 0
WHEN DA>=0.5 AND NVL(NINS/TOTL*100,0) > -6.023033*DA+32.392167 THEN 0
WHEN DA<0.5 AND NVL(NINS/TOTL*100,0)> 29.3806505 THEN 0
WHEN DA>=0.5 AND NVL(NINS/TOTL*100,0) > -3.499447*DA+22.849854 THEN 2
WHEN DA<0.5 AND NVL(NINS/TOTL*100,0)> 21.1001305 THEN 2
WHEN DA>=0.5 AND NVL(NINS/TOTL*100,0) > 0*DA+15.38462 THEN 4
WHEN DA<0.5 AND NVL(NINS/TOTL*100,0)> 15.38462 THEN 4
WHEN DA>=0.5 AND NVL(NINS/TOTL*100,0) > 2.176345*DA+8.906562 THEN 6
WHEN DA<0.5 AND NVL(NINS/TOTL*100,0)> 9.9947345 THEN 6
WHEN DA>=0.5 AND NVL(NINS/TOTL*100,0) > 2.320639*DA+4.071047 THEN 8
WHEN DA<0.5 AND NVL(NINS/TOTL*100,0)> 5.2313665 THEN 8
ELSE 10
END NINSC,
```

#### Percent Predators

```
CASE WHEN NVL(TOTL,0)<10 THEN 0
WHEN DA>=0.5 AND NVL(PREDS/TOTL*100,0) > -5.392487*DA+38.397046 THEN 0
WHEN DA<0.5 AND NVL(PREDS/TOTL*100,0)> 35.7008025 THEN 0
WHEN DA>=0.5 AND NVL(PREDS/TOTL*100,0) > -4.843725*DA+31.73541 THEN 2
WHEN DA<0.5 AND NVL(PREDS/TOTL*100,0)> 29.3135475 THEN 2
WHEN DA>=0.5 AND NVL(PREDS/TOTL*100,0) > -4.214623*DA+26.818036 THEN 4
WHEN DA<0.5 AND NVL(PREDS/TOTL*100,0)> 24.7107245 THEN 4
WHEN DA>=0.5 AND NVL(PREDS/TOTL*100,0) > -4.677956*DA+22.380878 THEN 6
WHEN DA<0.5 AND NVL(PREDS/TOTL*100,0)> 20.0419 THEN 6
WHEN DA>=0.5 AND NVL(PREDS/TOTL*100,0) > 0.9261267*DA+11.5282912 THEN 8
WHEN DA<0.5 AND NVL(PREDS/TOTL*100,0)> 11.99135455 THEN 8
ELSE 10
END PREDSC,
```
